# Supplementary material
Source: Research Square preprint supplement (doi:10.21203/rs.3.rs-9300712/v1)
Supplement: Supplementary file 1 [file 5679f8ce1c1f76ecc160181a.xlsx]

## Sheet: Hoja1
	Table 1. Overlap of upregulated inflammatory/immune genes in MGs and conjunctiva of C-IKKα mice with those reported in DED/MGD patients
	Signaling pathway	Sjögren S-DED patients (Liang et al., 2019)	Sjögren S-DED patients (De Paiva et al. 2021.)	Non-SS DED patients (Kessal et al. 2018)	Non-SS DED patients (Vergés et al., 2023)
	Gene family	22/29 (75.86%)	97/127 (76.38%)	109/168 (64.88%)	29/32 (90.61%)
	Chemokines/ cytokines and their receptors	IL6, IL15, IL23A, IL1RN, CXCL9, CXCL10. CCL4. CCL5, CCL22, CCL24, CXCL2, CXCR4, CCR1	B2M, BATF, BST2, CDKN1A, CXCL1, DUSP4, HLA-А, HLA-B, HLA-DRB3, ICAM1, IF135, IFITM1, IL19, ILIR1, IL1R2, IL2RG, IL4R, IRF7, MUC1, MX1, PML, PSMB8, PSMB9, TNFSF138	IL1A, IL1B, IL2, IL3, IL4, IL5, IL6, IL7, IL8, IL9, IL10, IL11, IL12A, IL12B, IL13, IL15, IL17A, IL18, IL21, IL22, IL23A, IL1RN, IL6R, IL10RB, IL22RA2, IL23R, IL1R1, IL1RAP, IL18RAP, TSLP, CXCL1, CXCL2, CXCL3, CXCL5, CXCL6, CXCL9, CXCL10, CCL2, CCL3, CCL4, CCL5, CCL7, CCL8, CCL11, CCL13, CCL16, CCL17, CCL19, CCL20, CCL21, CCL22, CCL23, CCL24, CXCR1, CXCR2, CXCR4, CCR1, CCR2, CCR3, CCR4, CCR7
	TNF superfamily	TNF, TNFAIP3	TNFAIP3	TNF, LTA, LTB, CD40, CD40LG, FASLG, TNFSF14, TRAF2, TNFAIP3, TRADD, BIRC2
	Apoptosis		BAX, CTSC, LY96, PSMB8, PSMB9
	MAPK activation	MAP2K6		MAP2K1, MAP2K4, MAP2KS, MAP3K1, MAP3K5, МАРЗК7, МАР3K9, MAPK1, МАРК14, МАРК, МАРКВ, МАРКАРК2, МАРКАРК, MKNK1, RAF1
	Metaloproteases			MMP3, MMP9
	STAT family	STAT1, STAT2	STAT1, STAT2	STAT1, STAT2, STAT3
	NF-κB signaling			NFKB1, RELA, RELB
	NLRs signaling		CXCL1, IRF7, STAT1, TMEM173 (STING1), TNFAIP3, TRAF5
	Complement and related proteins	C2, C1QB, CFB, ITGB2	C2, CFB, CF1, C4A, C4B, SERPING1	C2, C3, C4А, C5, С6, C7, C8А, C8B, C9, C1QA, C1QB, C1R, C1S, CFB, CFD, CD55, C3AR1, ITGB2, MASP1, MASP2
	Prostaglandin signaling	PTGR		PTGDR2, PTGER1, PTGER2, PTGER3, PTGER4, PTGFR, PTGIR, PTGS1, PTGS2 (Pge2, Cox2)
	Class I MHC		HLA-A, HLA-B, B2M, LY96, PSMB8, PSMB9, TAP1, TAP2		HLA-A, TAP1, CTSS, MYD88, PSMB7, PSMB8, TAРBР, CD14
	Class II MHC	HLA-DRA, HLA-DRB1	HLA-DRB3, HLA-DMA, CD74, CTSC	HLA-DRA, HLA-DRB1, CD4, CD86, CD163, TREM2, MRC1, TYROBP	HLA-DRB1, HLA-DMB, HLA-DPA1, HLA-DRA, HLA-DRB3, CTSC, CTSS
	Innate immune system		B2M, BST2, C2, C4A/B, CEACAM1, CFB, CFI, CTSC CXCL1, DUSP4, HLA-B, IFIH1, IRF7, LY96, MUC1, PIGR, PSMB8, PSMB9, S100A8, S100A9, SERPING1, TMEM173, TNFAIPЗ
	Adaptive immune system		B2M, CD74, CTSC, HLA-A, HLA-B, HLA-DRB3, ICAM1, IFITM1, LY96, PSMB8, PSMB9, TAP1, TAP2
	B cell receptor signaling		IFTM1, PSMB8, PSMB9
	Lymphocyte activation		B2M, BATF, BST2, CD74, CDKN1A, CEACAM1, HLA-A, HLA-B, HLA-DRB3, ICAM1, IL4R, PRDM1, TNFAIPЗ, TNFSF13B, XBP1
	Type I Interferon and related proteins		IF135, IFITM1, IRF7, MX1, PSMB8, PSMB9, STAT1, STAT2	IFNA1, IFNB1, IFI44, IFIT1, IFIT2, IFIT3, IRF1, IRF3, IRF5, IRF7, MХ1, MX2, OAS2, OASL	HLA-A, JAK1, IFITM1, MX1, STAT1, STAT2, IRF7, PSMB8
	Type II Interferon and related proteins		HLA-DRB3, ICAM1, STAT1	IFNG, IRFT	HLA-A, HLA DRB3, HLA-DRA, HLADPAI, HLA-DRB1, STAT1, B2M, IRF7, JAK1
	TLR and associated factors	LY96, NOD2	LY96, IRF7, S100A8, S100A9	NOD2, IRF7, TLR1, TLR2, TLR3, TLR4, TLR5, TLR6, TLR7, TLR8, TLR9
	Leukotriene receptors and related enzymes	LTB4R, LTB4R2		LTB4R, LTB4R2, CYSLTR1, CYSLTR2, ALOX12, ALOX15, ALOX5, PLA2G4A
