# Supplementary material
Source: Research Square preprint supplement (doi:10.21203/rs.3.rs-9300712/v1)
Supplement: Supplementary file 2 [file 5b07d13a9775d0e67afd71ce.xlsx]

## Sheet: Hoja1
	Table S3. Altered expression of genes regulating acinar cell proliferation, differentiation, and adhesion in meibomian glands of C-IKKα mice
		A. Upregulated genes in C-IKKα mice								B. Downregulated genes in C-IKKα mice
	Gene	Gene name	p-adjust		Itgae	Integrin alpha E	6.83E-76		Gene	Gene name	p-adjust		Cldn17	Claudin 17	3.56E-03
	Biomarkers of basal acinar cells				Itgav	Integrin alpha V	5.69E-07		Biomarkers of differentiated meibocytes				Cldn19	Claudin 19	1.53E-06
	Ccnd1	Cyclin D1	2.68E-02		Itgax	Integrin alpha X	1.26E-133		Cebpb	CCAAT/enhancer binding protein beta	7.60E-07		Cldn23	Claudin 23	3.02E-02
	Ccnd2	Cyclin D2	6.38E-04		Itgb1	Integrin beta 1	2.05E-50		DNase2a	Deoxyribonuclease II alpha	4.21E-36		Ctnna3	Catenin Alpha 3	5.92E-03
	Ccnd3	Cyclin D3	2.17E-14		Itgb2	Integrin beta 2	1.09E-120		Dhcr24	24-Dehydrocholesterol reductase	2.30E-13		Ctnnd2	Catenin delta 2	2.24E-03
	Cdh1	Cadherin 1	1.70E-03		Itgb3	Integrin beta 3	1.99E-14		Dkkl1	Dickkopf-like 1	6.97E-02		Dsc1	Desmocollin 1	2.52E-08
	Dsg2	Desmoglein 2	6.46E-17		Itgb4	Integrin beta 4	1.34E-05		Egr2	Early growth response 2	1.96E-13		Dsc2	Desmocollin 2	2.76E-03
	Egf	Epidermal growth factor	1.60E-02		Itgb5	Integrin beta 5	2.22E-06		Elovl3	Elongation of very long chain fatty acids 3	9.35E-20		Dsc3	Desmocollin 3	6.68E-09
	Egfr	Epidermal growth factor receptor	1.00E-18		Itgb6	Integrin beta 6	3.31E-32		Far1	Fatty acyl CoA reductase 1	3.66E-10		Dsg1a	Desmoglen 1 alpha	4.90E-10
	Slc1a3	Solute carrier family 1 member3	2.97E-06		Itgb7	Integrin beta 7	1.054-51		Far2	Fatty acyl CoA reductase 2	4.43E-19		Dsg1b	Desmoglein 1 beta	6.66E-14
	Adhesion junctions between basal acinar cells/ basal acinar cells to ECM				Itgb8	Integrin beta 8	2.69E-19		Fdps	Farnesyl diphosphate synthetase	5.03E-16		Dsg3	Desmoglein 3	3.06E-06
	Cdh1	Cadherin 1	1.70E-03		Itgbl1	Integrin beta like 1	5.94E-15		Hdac3	Histone deacetylase 3	1.48E-07		Dsg4	Desmoglein 4	1.06E-07
	Cdh4	Cadherin 4	1.03E-08		Lama1	Laminin alpha 1	8.43E-03		Plin2	Perilipin 2	8.25E-34		Dsp	Desmoplakin	8.27E-13
	Itga1	Integrin alpha 1	2.41E-39		Lama3	Laminin alpha 3	2.55E-24		Pparg	Peroxisome proliferator activated receptor gamma	8.77E-08		Dst	Dystonin	1.23E-03
	Itga2	Integrin alpha 2	7.53E-59		Lama4	Laminin alpha 4	4.20E-21		Scd1	Stearoyl-Coenzyme A desaturase 1	1.15E-12		Evpl	Envoplakin	1.33E-02
	Itga3	Integrin alpha 3	2.40E-10		Lama5	Laminin alpha 5	2.40E-15		Scd2	Stearoyl-Coenzyme A desaturase 2	9.17E-23		Jup	Junction plakoglobin	2.40E-18
	Itga4	Integrin alpha 4	7.26E-56		Lamc1	Laminin gamma 1	3.96E-10		Scd3	Stearoyl-Coenzyme A desaturase 3	5.08E-17		Nectin2	Nectin cell adhesion molecule 2	7.76E-07
	Itga5	Integrin alpha 5	4.97E-19		Lamc2	Laminin gamma 2	3.33E-159		Scd4	Stearoyl-Coenzyme A desaturase 4	3.41E-17		Nectin3	Nectin cell adhesion molecule 3	7.63E-04
	Itga6	Integrin alpha 6	1.25E-28		Lamc3	Laminin gamma 3	1.88E-02		Slc27a4	Solute carrier family 27	1.76E-24		Nectin4	Nectin cell adhesion molecule 4	2.90E-13
	Itga7	Integrin alpha 7	1.14E-31		Plec	Plectin	6.22E-07		Soat1	Sterol O-acyltransferase 1	1.89E-21		Ocln	Occludin	7.61E-09
	Itga9	Integrin alpha 9	1.22E-06		Pxn	Paxillin	7.18E-33		Adhesion junctions in differentiated meibocytes				Perp	PERP, TP53 apoptosis effector	4.60E-29
	Itgad	Integrin alpha D	2.49E-03		Tln1	Talin 1	2.49E-23		Camsap3	Calmodulin regulated spectrin-associated protein3	1.49E-23		Pkp1	Plakophilin 1	5.86E-12
									Cldn1	Claudin 1	5.16E-15		Pkp3	Plakophilin 3	4.91E-10
									Cldn2	Claudin 2	2.41E-06		Pkp4	Plakophilin 4	1.83E-23
									Cldn3	Claudin 3	6.14E-02		Ppl	Periplakin	2.26E-03
									Cldn4	Claudin 4	4.01E-11		Plekha7	Pleckstrin homology domain containing, family A member 7	1.66E-02
									Cldn5	Claudin 5	4.21E-03		Tjp1	Tight junction protein 1	3.87E-02
									Cldn12	Claudin 12	1.07E-06		Tjp2	Tight junction protein 2	8.65E-03
									Cldn14	Claudin 14	8.17E-15		Tjp3	Tight junction protein 3	2.83E-06
