# Supplementary material
Source: Research Square preprint supplement (doi:10.21203/rs.3.rs-9300712/v1)
Supplement: Supplementary file 2 [file b0b9b900fa7c8541b3178a63.pdf]

## Supplementary Information

**“Pathogenic Role of Cytoplasmic IKK $\alpha$  in Meibomian Gland Dysfunction and Dry Eye Disease”**. Verónica A. García-García V. A. et al.

### Supplementary Figures and Tables

**Supplementary Fig. S1. Progressive acinar cell hyperplasia, hyperproliferation, and inflammation in the meibomian glands of C-IKK $\alpha$  mice.** **A** MGs from 2-month-old C-IKK $\alpha$  mice show structural disorganization, with inter-acinar (blue/white arrowhead) and intra-acinar (orange arrowhead) inflammation, as well as basal cell hyperplasia (red/white arrow). At 12 months, most acini consist primarily of basal acinar cells (red/white arrow) with few differentiated meibocytes (black arrows), abundant inflammatory foci (blue/white arrowheads), and evident fibrosis (asterisk). **B** Quantification of BrdU-positive basal acinar cells reveals a significant increase in C-IKK $\alpha$  mice older than 2 months. Data were collected from 3–4 fields per sample (20 $\times$ ), and quantified from microscope images using Fiji, an open-source image analysis software, and are expressed as BrdU<sup>+</sup> cells/mm<sup>2</sup>. \*\* $p < 0.01$ ; \*\*\* $p < 0.005$ . Three mice per genotype and age were analyzed; and analyzed by three independent researchers. **C** CD45 immunostaining of MGs from 24-month-old control and C-IKK $\alpha$  mice shows abundant cellular infiltration in the transgenic mice, whereas in controls, inflammation is much lower and primarily confined to the conjunctiva (star). Scale bar: 50  $\mu$ m.

**Supplementary Fig. S2. Apoptosis and necrosis in the meibomian glands of C-IKK $\alpha$  mice.** Representative histological images 9-month-old transgenic mice showing: **A** apoptotic basal acinar cells (arrowheads) in the MGs; **B** necrosis (arrows) associated with inflammation. Scale bars: A: 30  $\mu$ m; B: 60  $\mu$ m.

**Supplementary Fig. S3. Expression pattern of keratin 5 and endogenous IKK $\alpha$  in control mice.** **A, B** K5 immunostaining in Control (**A**) and C-IKK $\alpha$  (**B**) mice shows keratin expression in basal acinar cells (red arrows) and ducts (d; black arrow) of the meibomian glands. **C** Representative immunostaining with the sc-7182 antibody showing endogenous IKK $\alpha$  expression in basal acinar cells (red arrows) and ducts (black arrow) of control mice. Four to five mice per genotype, aged 1-9 months, were analyzed. Images shown correspond to 1-month-old control mice. Scale bars: A, C, 60  $\mu$ m; B, 80  $\mu$ m.

**Supplementary Fig. S4. Enrichment of inflammatory pathway-associated gene signatures in C-IKK $\alpha$  mice.** GSEA/GOPB of meibomian glands from control and C-IKK $\alpha$  transgenic mice show enrichment of genes involved in inflammatory signaling pathways in transgenic mice. Gene sets were considered significantly dysregulated when *p-adjust* < 0.05 and FDR < 0.25.

**Supplementary Fig. S5. Enrichment of gene signatures associated with both innate and adaptive immunity in C-IKK $\alpha$  mice.** GOBP analysis of meibomian glands from control and C-IKK $\alpha$  transgenic mice reveals enrichment of genes involved in innate/adaptive immunity pathways, as well as immune activation processes, in the transgenic mice. Gene sets were considered significantly dysregulated when *p-adjust* < 0.05 and FDR < 0.25.

**Supplementary Fig. S6. Hallmarks of lipid-related genes are significantly downregulated in the meibomian glands of C-IKK $\alpha$  mice.** GOBP analysis reveals downregulation of genes encoding enzymes involved in lipid metabolism in the meibomian glands of C-IKK $\alpha$  transgenic mice. Gene sets were considered significantly dysregulated when *p-adjust* < 0.05 and FDR < 0.25.

**Supplementary Fig. S7. qPCR validation of dysregulated key genes involved in inflammation, immune response, lipid metabolism, and meibocyte differentiation in the meibomian glands of C-IKK $\alpha$  mice.** mRNA levels were measured in 9-month-old control and C-IKK $\alpha$  mice (each symbol represents one animal; circle: control mice; squares: transgenic mice); normalized to *Tbp*. **A** Increased central cytokine genes linked to dry eye disease. **B** Elevated H2-Ea/Eb complex components in C-IKK $\alpha$  mice. **C** Upregulation in C-IKK $\alpha$  mice of a 4-gene diagnostic signature distinguishing dry eye patients from healthy subjects. **D** Decreased expression of the key enzymes for meibum production in C-IKK $\alpha$  mice. **E** Increased basal acinar cell marker *Slc1a3* in the MGs of transgenic mice. **F** Reduced expression of early and late meibocyte differentiation markers in C-IKK $\alpha$  mice. **G** Induction of *Itgal*, encoding CD11a, the alpha subunit of the functional LFA-1 integrin, and its ligand *Icam1* in transgenic mice. **H** Upregulation of *Nlrp3* in C-IKK $\alpha$  mice. *p*-values <0.05 were considered significant: \*\* *p*-value<0.01; \*\*\* *p*-value<0.005; \*\*\*\* *p*-value<0.001; ns: not significant. Data are mean  $\pm$  SD.

**Supplementary Fig. S8. Upregulation of additional signaling pathways and functions related to innate and adaptive immune responses in C-IKK $\alpha$  mice.** GOBP analysis reveals upregulation of signaling pathways and functions related to innate and adaptive immune responses -including cell adhesion and matrix remodeling- in the meibomian glands and conjunctival tissues of C-IKK $\alpha$  mice. These changes have not been described in human studies of Sjögren's syndrome (SS) or non-SS patients used for comparison with our C-IKK $\alpha$  murine model. Gene were considered significantly upregulated in C-IKK $\alpha$  vs. Control when FC > 2 and *p-adjust* < 0.05.

**Supplementary Fig. S9. Decreased expression of the desmosomal proteins Desmoglein1 and Plakoglobin in the meibomian glands of C-IKK $\alpha$  mice.**

Immunohistochemical staining of MG sections from control and C-IKK $\alpha$  mice shows Desmoglein 1 (Dsg1) and Plakoglobin (Pkg) expression at the plasma membrane of all differentiated meibocytes in the acini of control mice. In contrast, in transgenic mice, these proteins are detected in only a few acini containing differentiated meibocytes (arrows). Four to five mice per genotype, aged 2-6 months, were analyzed. Images shown are from 4-month-old mice. Scale bar: 50  $\mu$ m.

**Supplementary Table of primers.** The sequences of the primers used in the qPCRs are shown.

**Table S1. Additional upregulated inflammatory/immune cluster genes in the MGs and conjunctiva of C-IKK $\alpha$  mice.** Genes highlighted in black are upregulated in C-IKK $\alpha$  mice but were not detected in the SS and non-SS studies used for comparison with our murine model. Genes highlighted in green are shared with at least one of the studies of DED/MGD patients, with or without Sjögren's syndrome (see Table 1). Genes highlighted in blue (*Il17c*, *Tbx21*, *Rorc*) are examples mentioned in the text as immunoregulatory genes that are upregulated in C-IKK $\alpha$  mice but were not detected in the referenced human DED samples. Gene were considered significantly upregulated when FC > 2 and p-adjust < 0.05 (C-IKK $\alpha$  vs. Control).

**Table S2. Downregulation of genes encoding lipid metabolism-related enzymes in the meibomian glands of C-IKK $\alpha$  mice.** Transgenic mice show downregulation of genes involved in processes related to meibum synthesis, including cholesterol and cholesterol esters metabolism, fatty acid biosynthesis and desaturation, fatty acid

elongation, metabolism of odd-chain and branched fatty acids, metabolism of WEs and O-acylated  $\omega$ -hydroxy fatty acids (OAHFAs), and the regulation of energy balance, lipid storage and mobilization. Underexpressed genes in C-IKK $\alpha$  mice: FC > 2 in Control vs IKK $\alpha$ , *p-adjust* < 0.05.

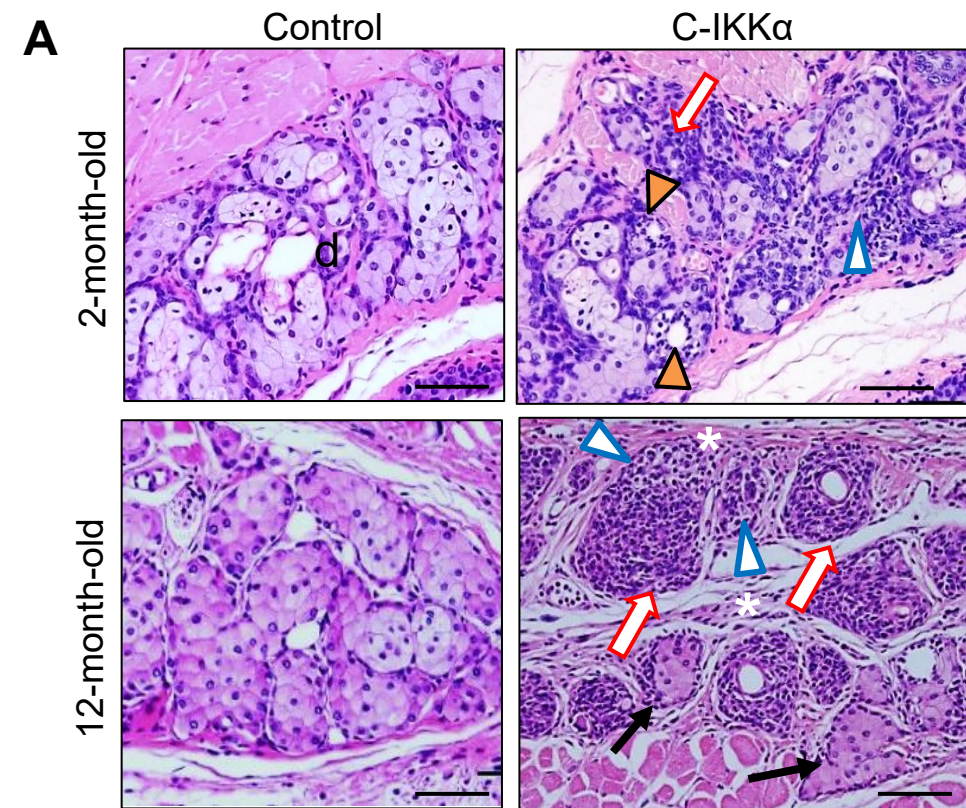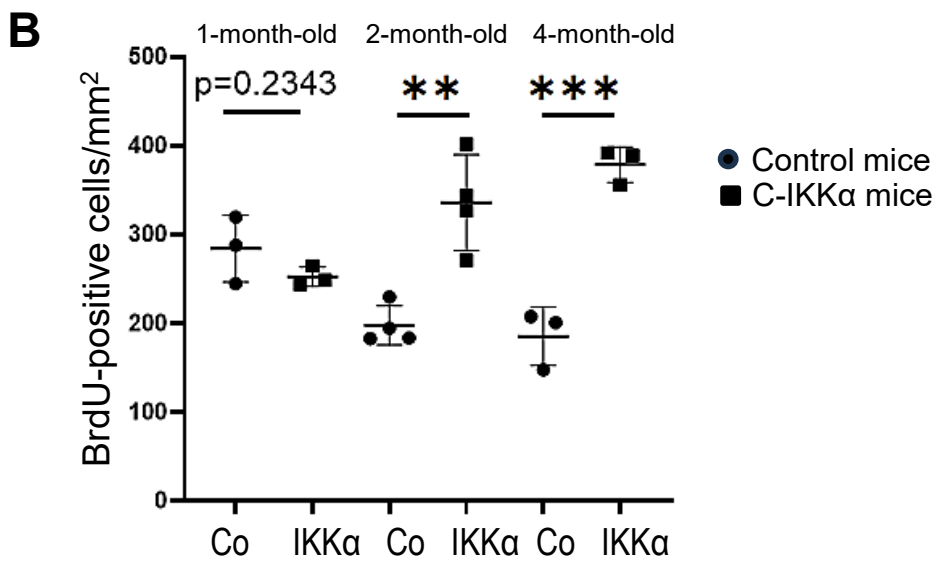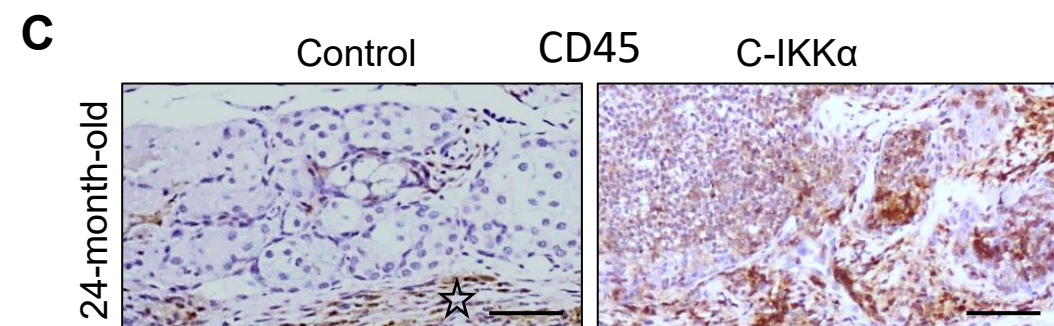

Supplementary Fig. S1

**A**

Apoptosis

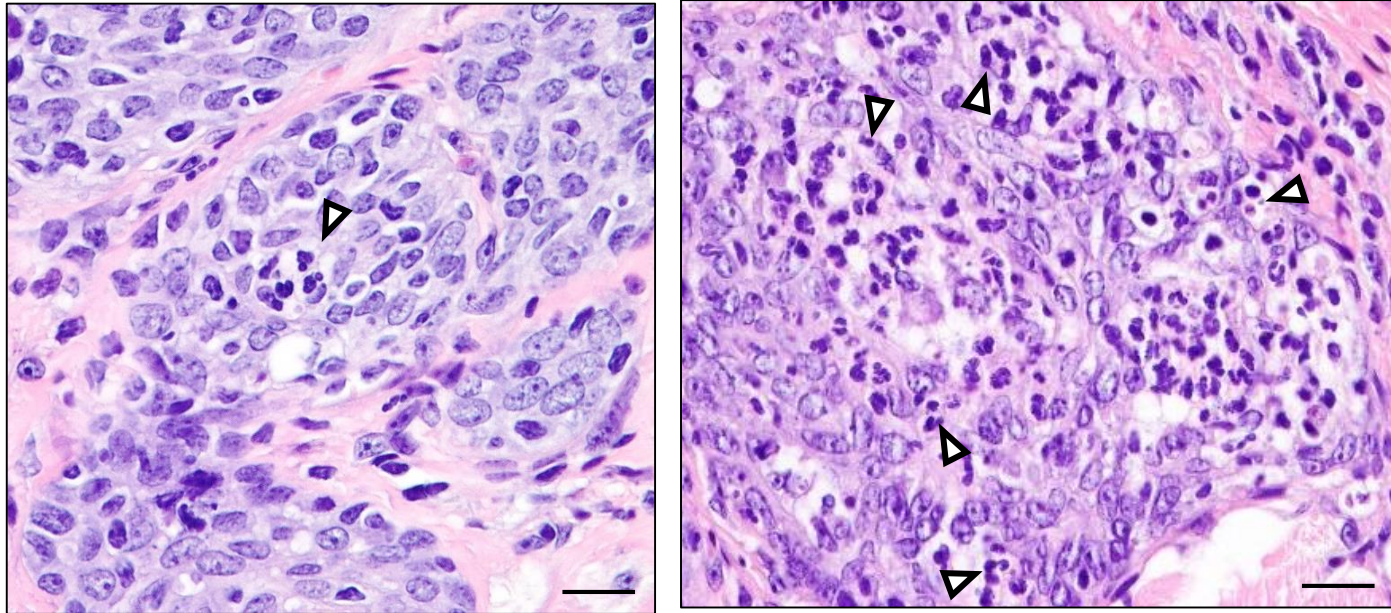

**B**

Necrosis

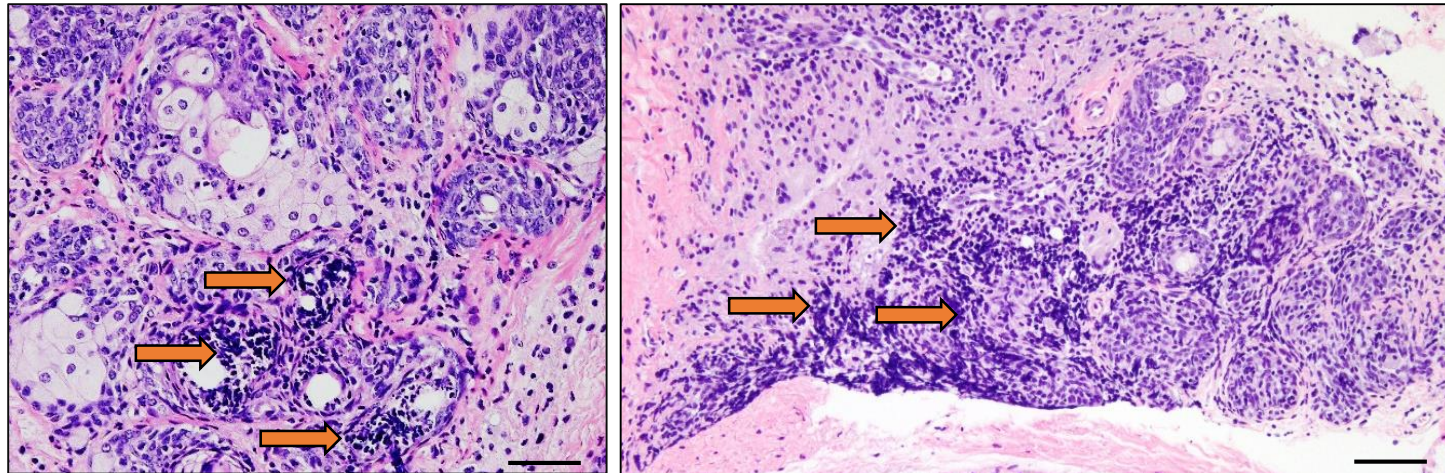

Supplementary Figure S2

K5

**A**

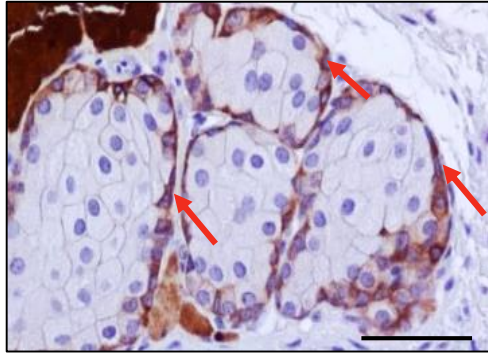

**B**

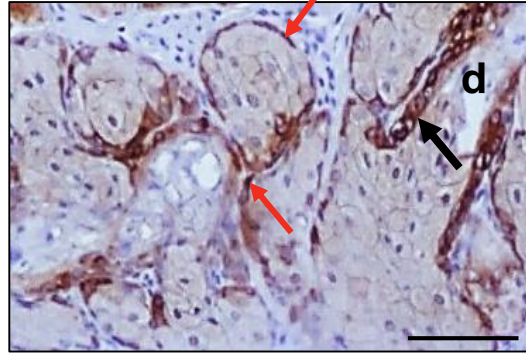

**C**

Mouse IKK $\alpha$

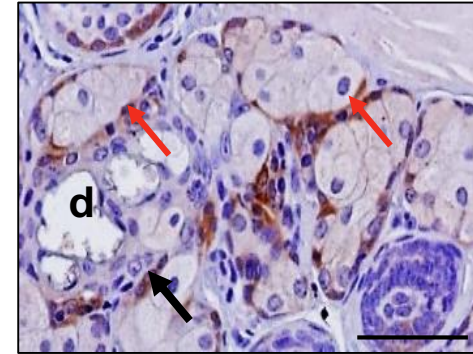

Supplementary Figure S3

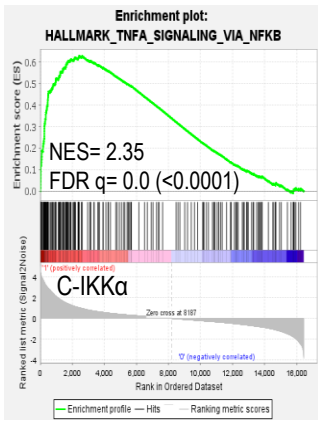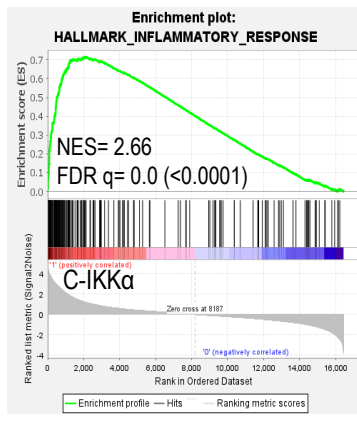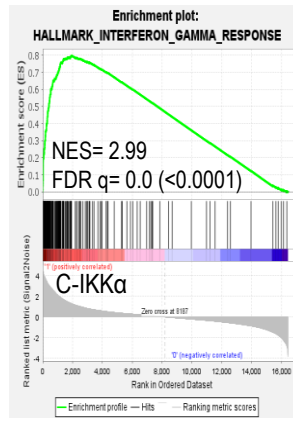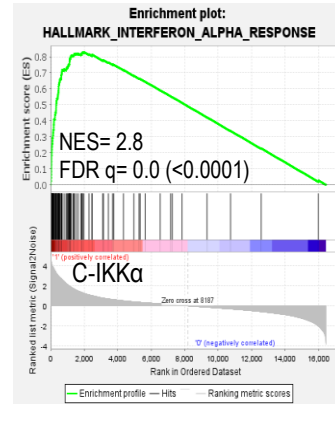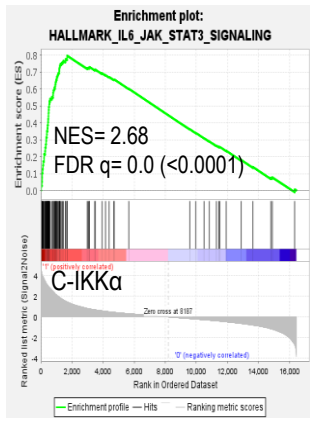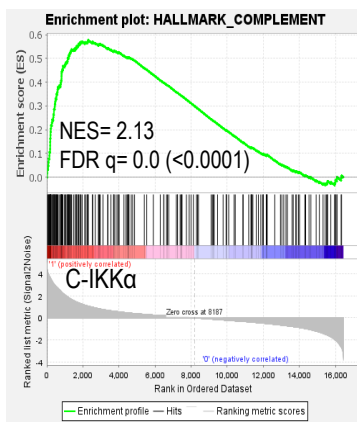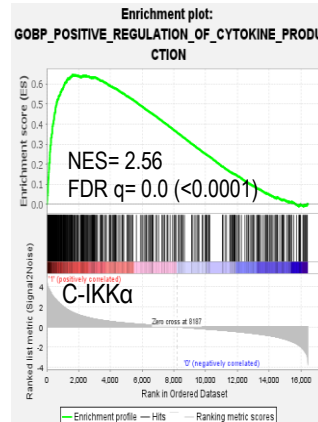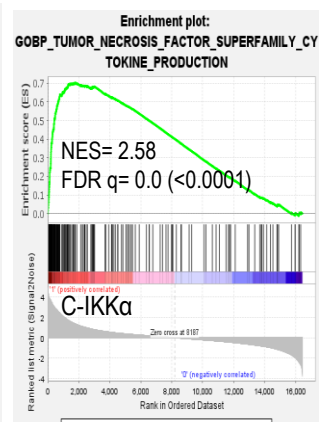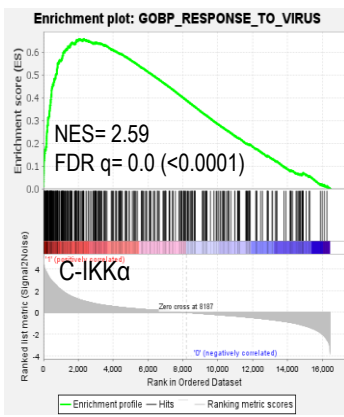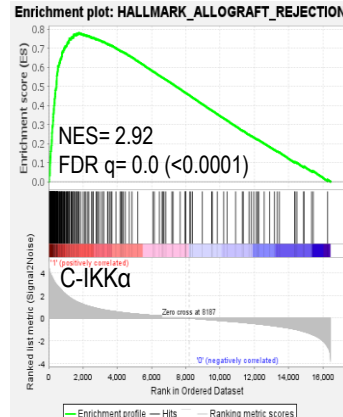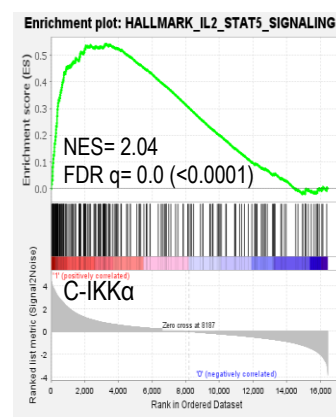

Supplementary Figure S4

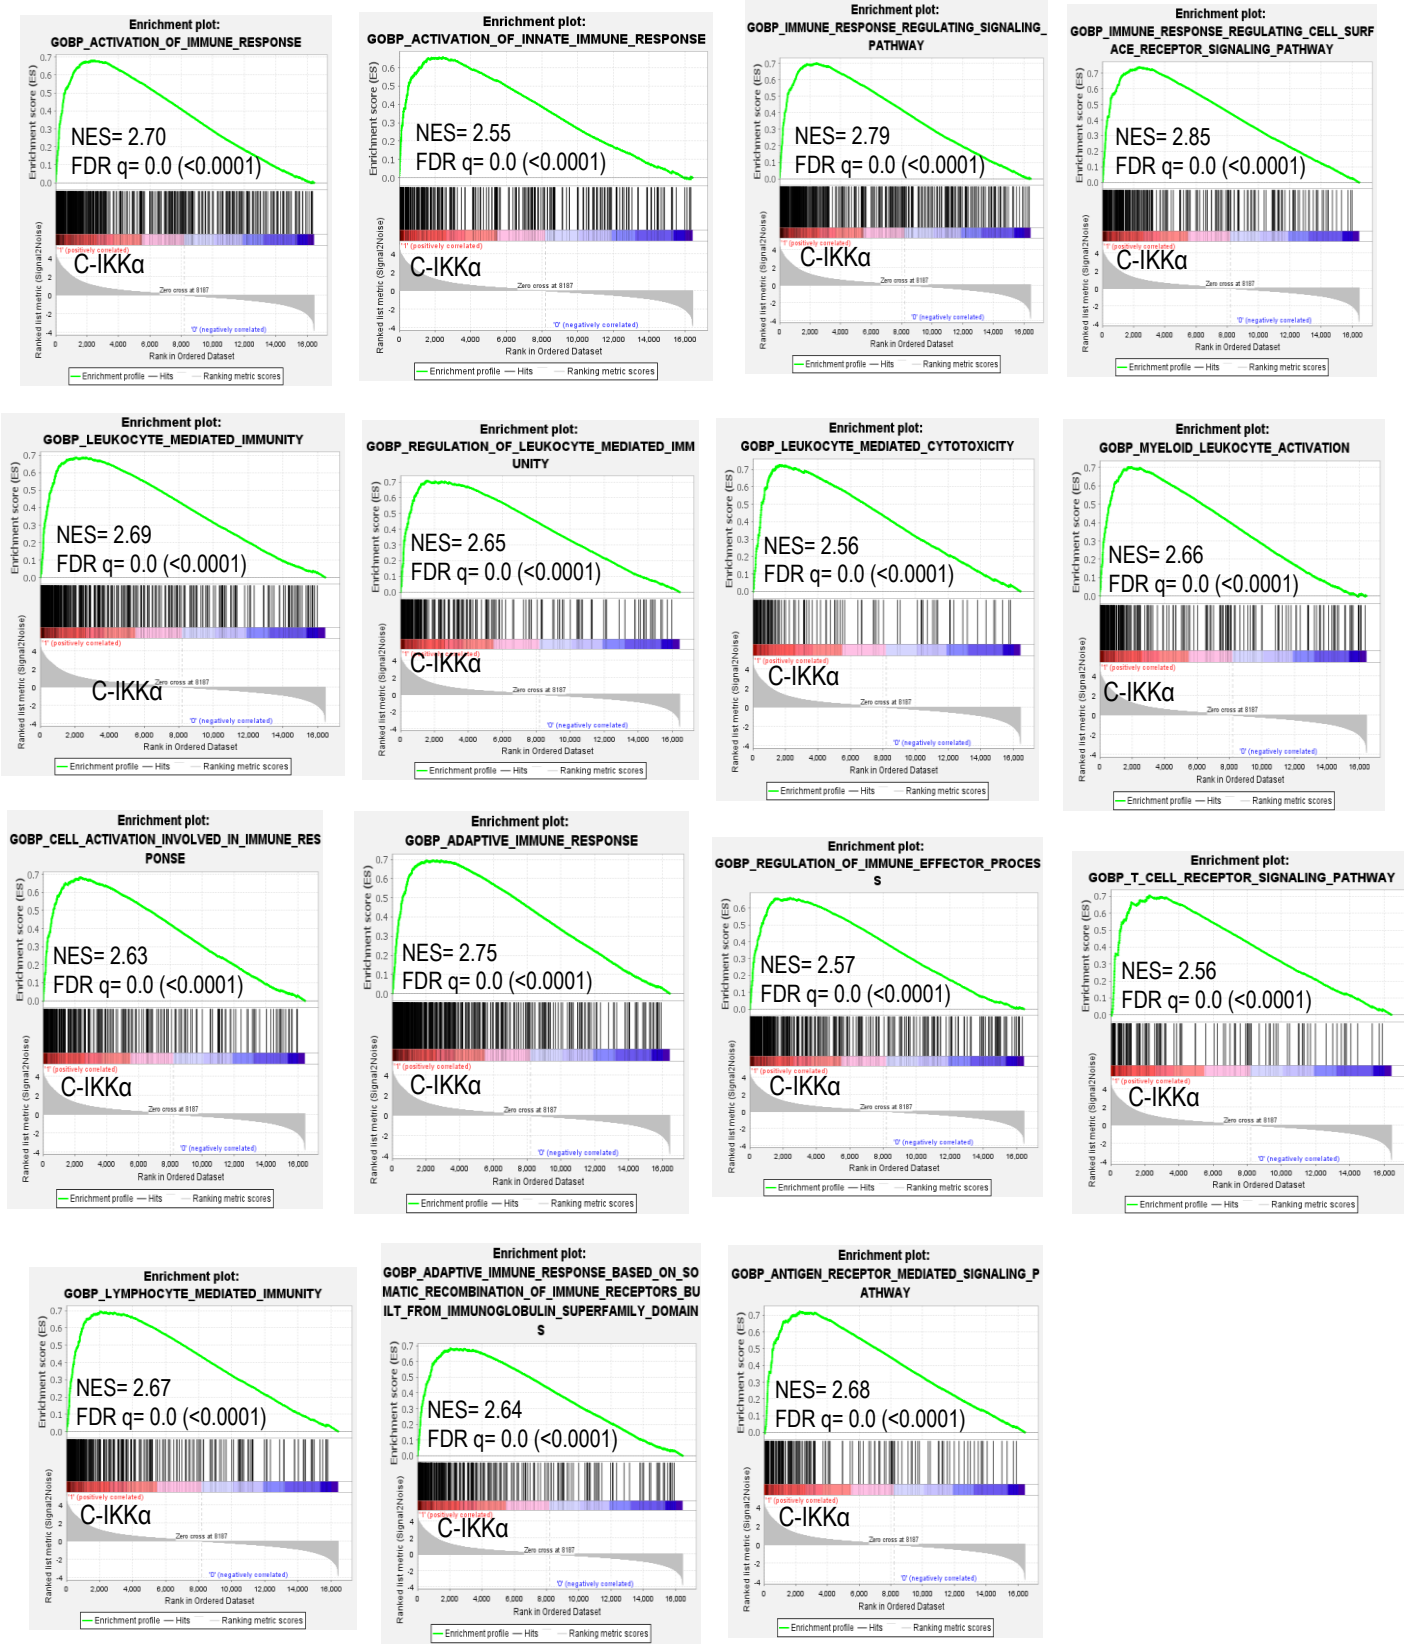

Supplementary Figure S5

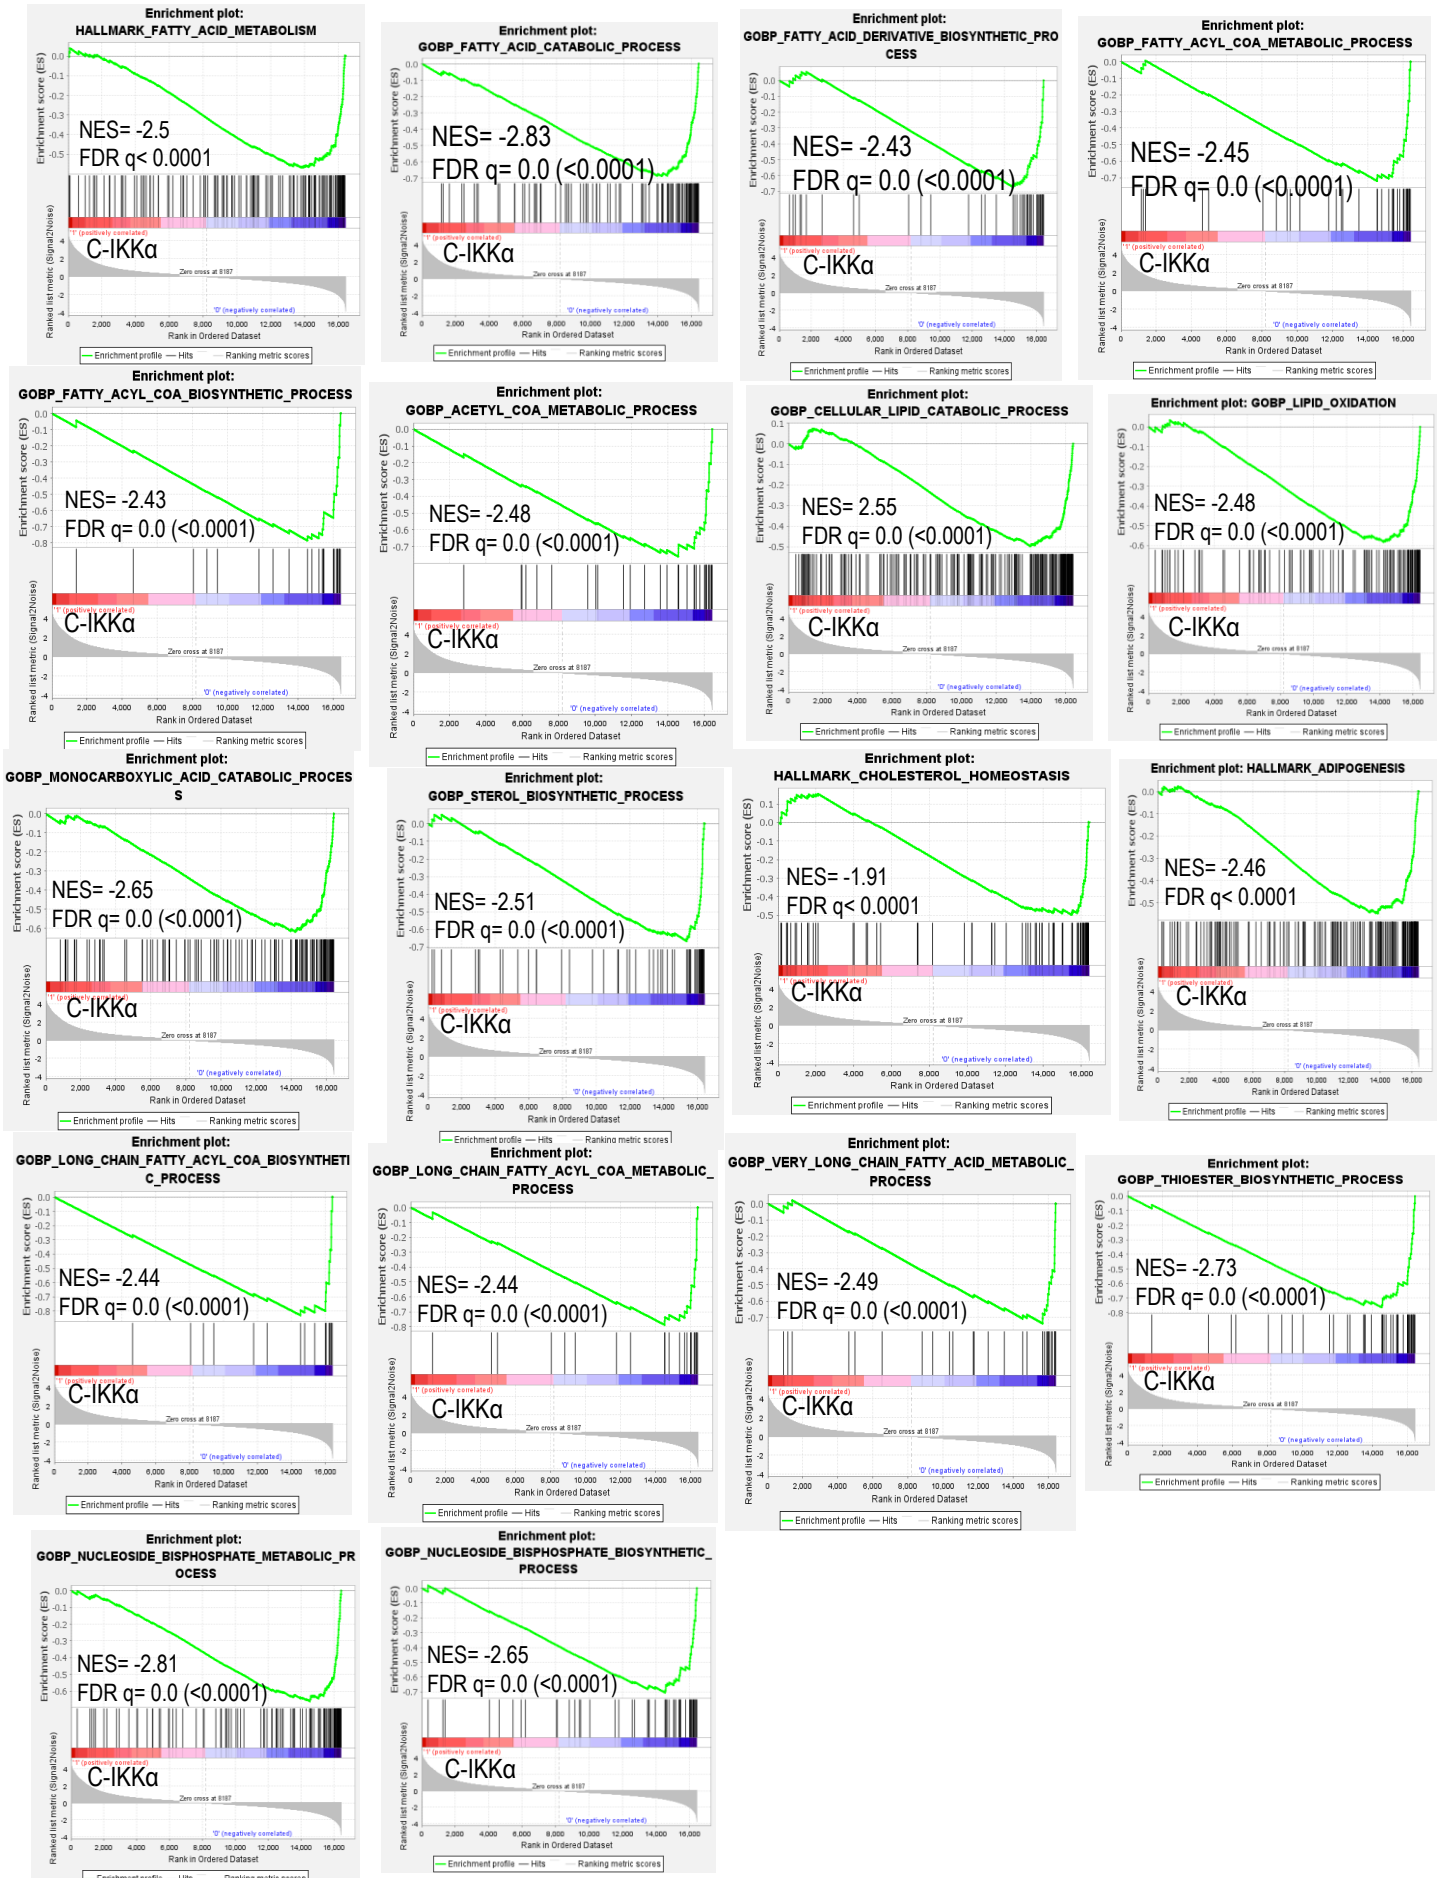

Supplementary Figure S6

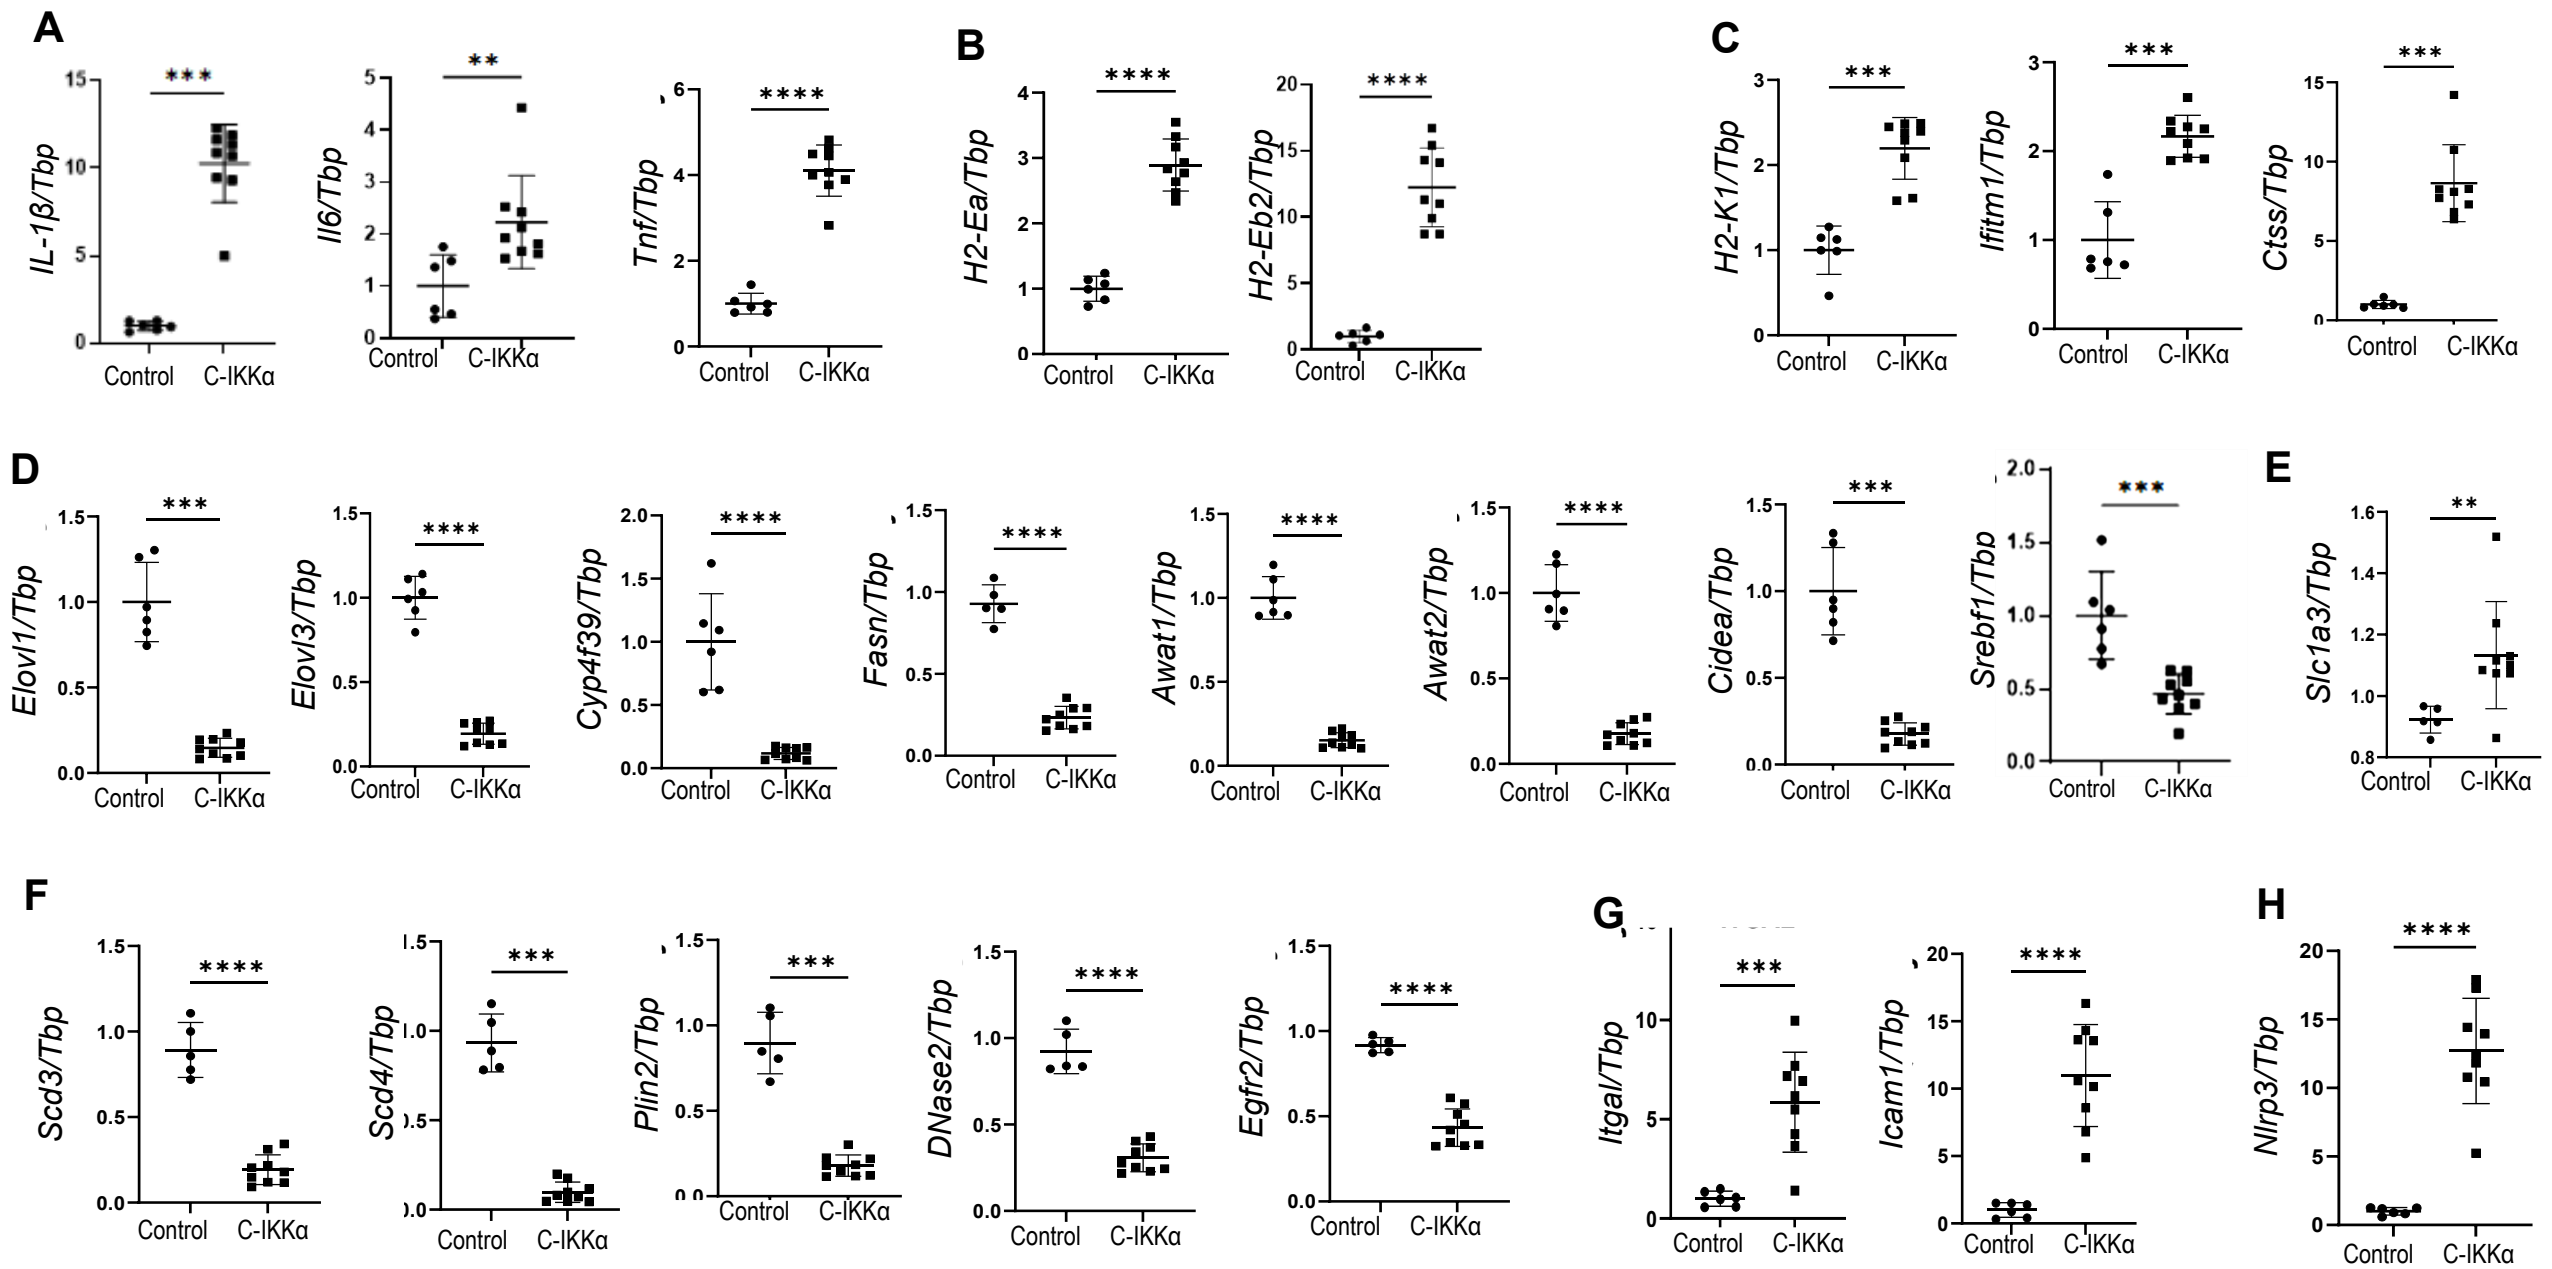

Suppl Figure S7

## General immune response

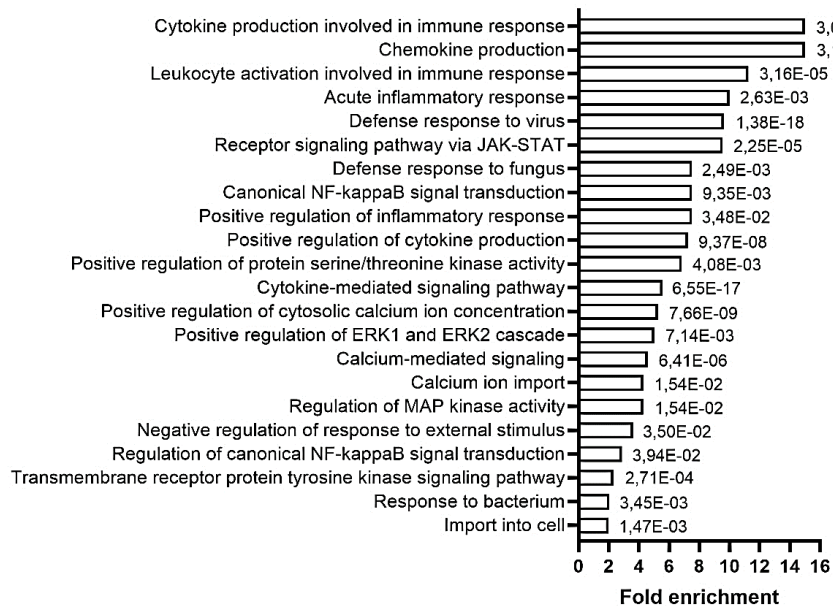

## Other processes

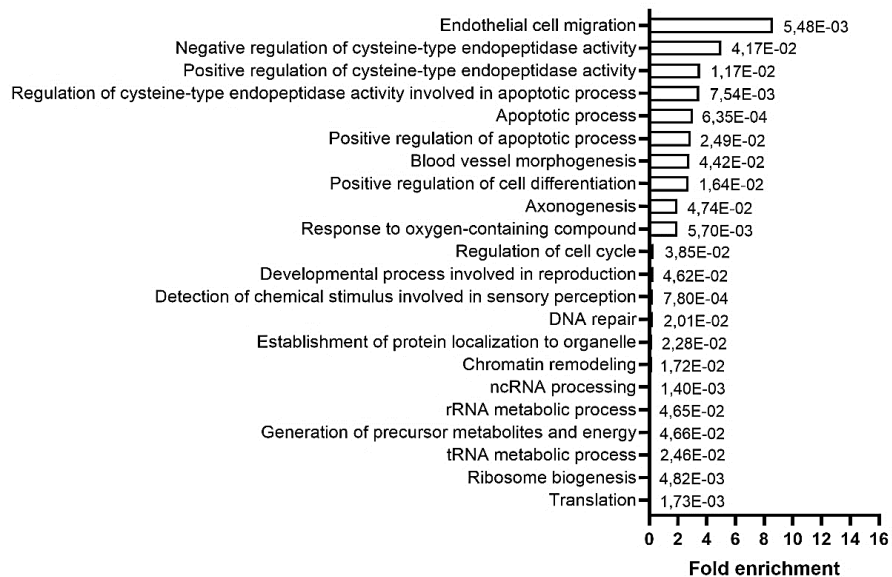

## Innate immune response

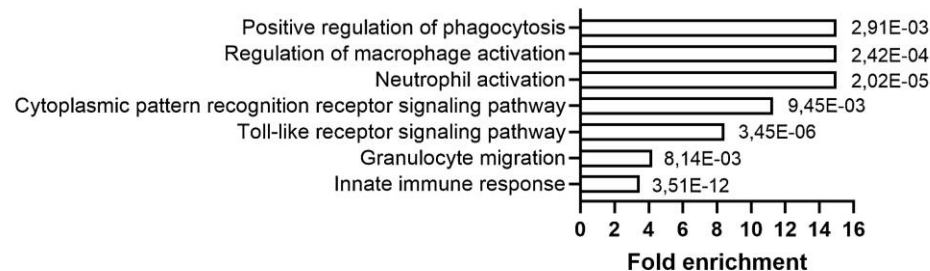

## Adaptive immune response

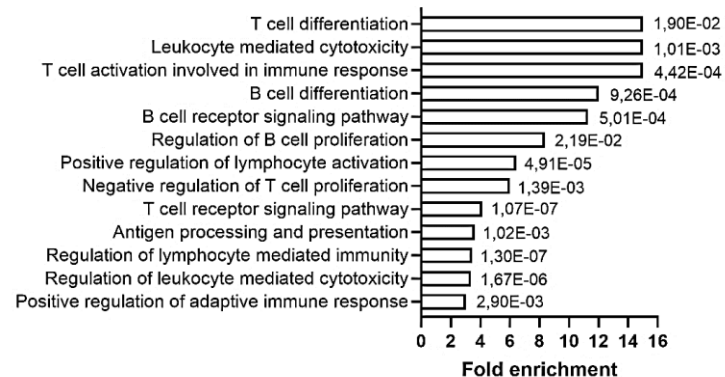

## Cell adhesion and matrix remodelling

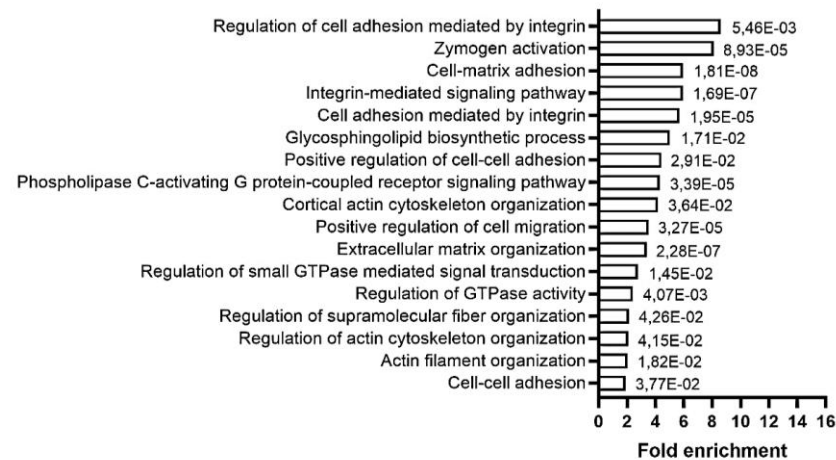

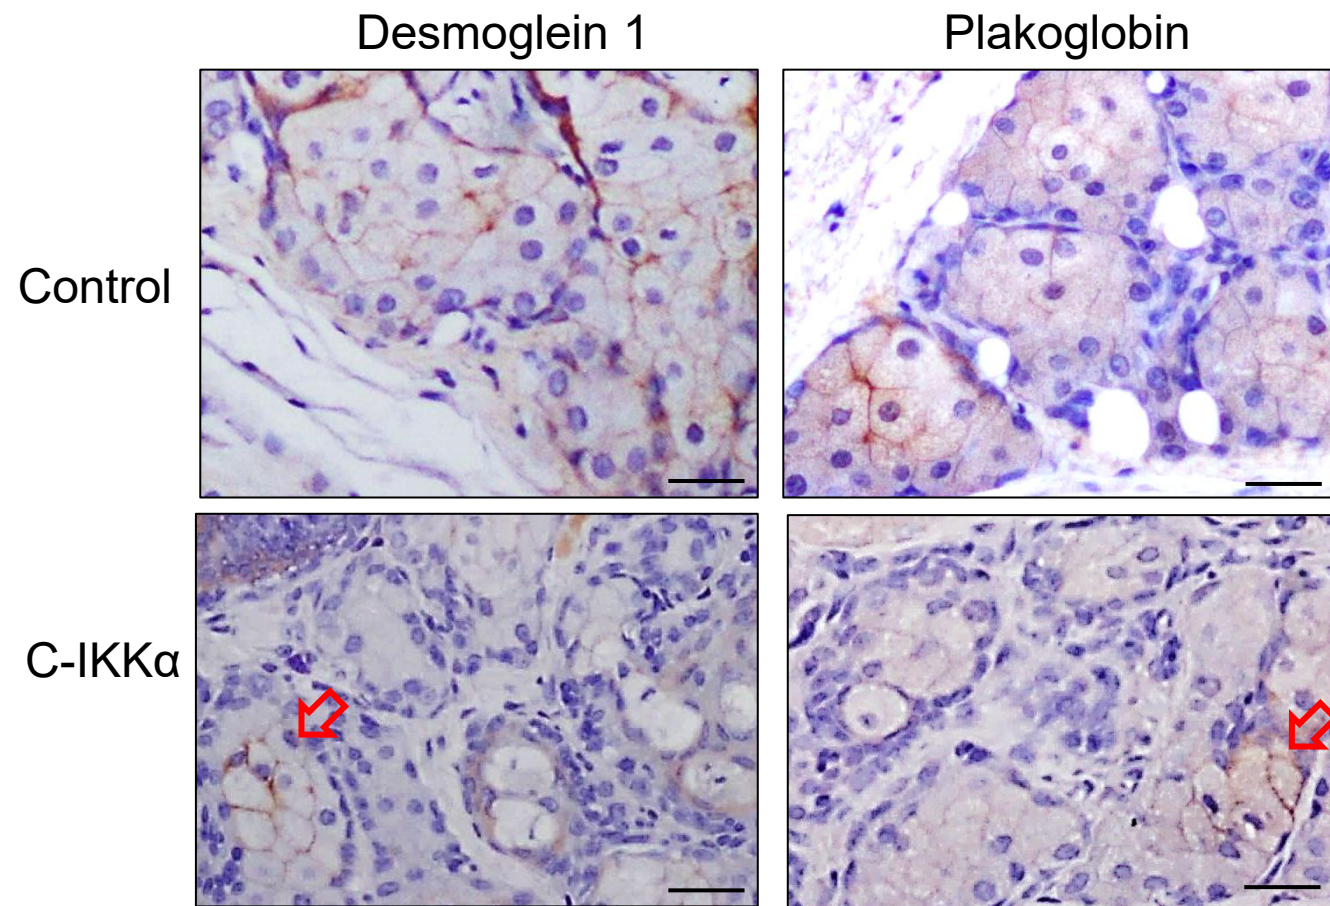

Suppl Figure S9

**Supplementary Table of Primers.** Oligonucleotide sequences used in qPCR analyses.

| Gene           | Oligonucleotides          |                          |
|----------------|---------------------------|--------------------------|
|                | Forward (5'→3')           | Reverse (5'→3')          |
| <i>Tbp</i>     | GGGAGAATCATGGACCAGAA      | GATGGGAATTCCAGGAGTCA     |
| <i>Pparg</i>   | GCTCCAAGAATACCAAAGTGCG    | ACAGACTCGGCACTCAATGG     |
| <i>Il1b</i>    | TGCCACCTTTTGACAGTGATG     | AGCCCTTCATCTTTTGGGGT     |
| <i>Il6</i>     | GCTACCAAAGTGGATATAATCAGGA | CCAGGTAGCTATGGTACTCCAGAA |
| <i>Tnf</i>     | CAGCCGATGGGTTGTACCTT      | TCTTGACGGCAGAGAGGAGG     |
| <i>H2-ea</i>   | ACTGTGAGGTGGATCACTGG      | AGGGTTTTCTTCAAACCTCCA    |
| <i>H2-eb2</i>  | CGCTAGGTCTGTTCATCCTCG     | GACTGATCCTGCTCTCAG       |
| <i>H2-k1</i>   | TGGAGTGGCTCCGAGATA        | TGGGCCTTTGGGAATCTGT      |
| <i>Ifitm1</i>  | ACTCTTCATGAAGTTCTGCTGC    | CTTCTGTCCCTAGACTTCACG    |
| <i>Ctss</i>    | CCACGCTGCCATCAGAAG        | AGTCCAGGGTAGGGTCTCTC     |
| <i>Ccl4</i>    | AACCTAACCCCGAGCAACAC      | AGGGTCAGAGCCCATTGGTG     |
| <i>Elovl1</i>  | GGTTGGCTGAGTACCTACACC     | GGCCACTCGAACCATCCGAA     |
| <i>Elovl3</i>  | GCAAGGTTGTTGAACTGGGAGA    | CATGAACCAGCCACCCGAAG     |
| <i>Cyp4f39</i> | GTGACTGCCAGGAGAGAATGA     | AGGTAGTGATGCAAGCGGTA     |
| <i>Fasn</i>    | GGAAGATGCCTTCCGCTACA      | CTCCTCCCGTACCTGGACAA     |
| <i>Awat1</i>   | GGCCGCTACCAACAGTTTAC      | AACGCCTGCCACCTTTATCT     |
| <i>Awat2</i>   | CAGCCCTTAAACATGGGGTGT     | GGAAGCGATTGACAAAGCCC     |
| <i>Cidea</i>   | ACAGAAATGGACACCGGGTA      | GACATTGAGACAGCCGAGGA     |
| <i>Slc1a3</i>  | TGGACTGGTTTCTGGACCG       | GTGCTCGACAATCCCTGCTC     |
| <i>Scd3</i>    | CCTGCTGCAAGAAGAGATGAC     | CGTCTTCACCTTCTCTCGTCC    |
| <i>Scd4</i>    | CTCAACGCTTCACCGATCCT      | ACCTGCTGGAGATCTCTTGTG    |
| <i>Plin2</i>   | TCTATGTCTCGTGGGTGGAGT     | GTGACTCGATGTGCTCAACA     |
| <i>Dnase2a</i> | CGCAGCTTGCAGCCATTGTA      | AGGAGCAGGACACCCTTCGTA    |
| <i>Egfr</i>    | TGGGTGGCCTCCTTTCATA       | AGGTTCCACGAGCTCTCTCT     |
| <i>Itgal</i>   | AAGGGACCAAAAAGGTGGGCA     | AGATCTGGCAGGGGATGACA     |
| <i>Icam1</i>   | GTGGGTGCAAGGTGGTTCTT      | GCAGTTCAGGGTCTGGTTT      |
| <i>Nlrp3</i>   | AAGCAATGCCCTTGGAGACA      | AGGCTGCAGTTGTCTAATTCCA   |

Table S1. Additional upregulated inflammatory/immune cluster genes in the MGs and conjunctiva of C-IKK $\alpha$  mice.

| Signaling pathway<br>Gene family                        | Genes                                                                                                                                                                                                                                                                                                                                                                                                                                                                                                                                                                                                                                                                                                                                                                                                                                                                                                                                                                                                                                                                                                                                                                                                                                                                                                                                                                                                                                                                                                                                                                                                                                                                                                                                            |
|---------------------------------------------------------|--------------------------------------------------------------------------------------------------------------------------------------------------------------------------------------------------------------------------------------------------------------------------------------------------------------------------------------------------------------------------------------------------------------------------------------------------------------------------------------------------------------------------------------------------------------------------------------------------------------------------------------------------------------------------------------------------------------------------------------------------------------------------------------------------------------------------------------------------------------------------------------------------------------------------------------------------------------------------------------------------------------------------------------------------------------------------------------------------------------------------------------------------------------------------------------------------------------------------------------------------------------------------------------------------------------------------------------------------------------------------------------------------------------------------------------------------------------------------------------------------------------------------------------------------------------------------------------------------------------------------------------------------------------------------------------------------------------------------------------------------|
| Chemokines/ cytokines<br>and their receptors            | <i>Il1b, Il2, Il5, Il6, Il7, Il9, Il10, Il12b, Il15, Il17c, Il17d, Il23a, Il31a, Il36b, Il36a, Il6st, Il1rn, Il1r1, Il1r2, Il2rg, Il4ra, Il7r, Il9r, Il10ra, Il13ra1, Il15ra, Il18rap, Il23r, Il36rn, Ccl1, Ccl3, Ccl4, Ccl5, Ccl7, Ccl9, Ccl12, Ccl20, Ccl22, Ccl27a, Cxcl1, Cxcl2, Cxcl3, Cxcl5, Cxcl9, Cxcl10, Cxcl13, Cxcl14, Cxcl16, Cxcr3, Cxcr4, Cxcr5, Ccr1, Ccr2, Ccr4, Ccr5, Ccr6, Ccr7, Ccr8, Ccr12, Icam1</i>                                                                                                                                                                                                                                                                                                                                                                                                                                                                                                                                                                                                                                                                                                                                                                                                                                                                                                                                                                                                                                                                                                                                                                                                                                                                                                                        |
| TNF superfamily                                         | <i>Tnf, Lta, Ltb, Cd40, Cd40lg, Faslg, Tnfs4, Tnfs8, Tnfs10, Tnfs11, Tnfs13b, Tnfsf14, Tnfs15, Traf2, Tnfaip3, Birc2</i>                                                                                                                                                                                                                                                                                                                                                                                                                                                                                                                                                                                                                                                                                                                                                                                                                                                                                                                                                                                                                                                                                                                                                                                                                                                                                                                                                                                                                                                                                                                                                                                                                         |
| Apoptosis                                               | <i>Fas, Fasl, Bax, Rela, Casp1, Casp3, Casp4, Casp6, Casp7, Casp8, Casp12, Trp53, Ly96, Ctsc, Psmb8, Psmb9, Tnf, Clu, Cd69, Tnfsf10, Birc3, Cd38, Bmf, Ifngr1, Irf1, Bcl2l11, Bid, Prf1, Psen2, Ppt1, Sod2, Isg20, Gadd45b, Irfb1, Gadd45a, Tspo</i>                                                                                                                                                                                                                                                                                                                                                                                                                                                                                                                                                                                                                                                                                                                                                                                                                                                                                                                                                                                                                                                                                                                                                                                                                                                                                                                                                                                                                                                                                             |
| MAPK activation                                         | <i>Mapkapk2, Mapkapk3, Map2k5, Map3k1, Map3k4, Map3k5, Map3k13, Map3k14, Mapk7, Mapk9, Mknk1</i>                                                                                                                                                                                                                                                                                                                                                                                                                                                                                                                                                                                                                                                                                                                                                                                                                                                                                                                                                                                                                                                                                                                                                                                                                                                                                                                                                                                                                                                                                                                                                                                                                                                 |
| Metalloproteases                                        | <i>Mmp3, Mmp9, Mmp7, Mmp12, Mmp13, Mmp14, Mmp15, Mmp16, Mmp23, Mmp25, Mmp27</i>                                                                                                                                                                                                                                                                                                                                                                                                                                                                                                                                                                                                                                                                                                                                                                                                                                                                                                                                                                                                                                                                                                                                                                                                                                                                                                                                                                                                                                                                                                                                                                                                                                                                  |
| STAT family                                             | <i>Stat1, Stat2, Stat3, Stat4, Stat5a, Stat5b, Stat6</i>                                                                                                                                                                                                                                                                                                                                                                                                                                                                                                                                                                                                                                                                                                                                                                                                                                                                                                                                                                                                                                                                                                                                                                                                                                                                                                                                                                                                                                                                                                                                                                                                                                                                                         |
| NF- $\kappa$ B signaling pathway                        | <i>Nfkb2, Mpa3k14 (NIK), Relb, Rela, Ikbkb (Ikkb), Nfkb1, Rel, Nfkbia (IKK<math>\alpha</math>), Nfkbie, Nfkbib, Nfkbid, Ldoc1</i>                                                                                                                                                                                                                                                                                                                                                                                                                                                                                                                                                                                                                                                                                                                                                                                                                                                                                                                                                                                                                                                                                                                                                                                                                                                                                                                                                                                                                                                                                                                                                                                                                |
| Complement signaling<br>pathway and related<br>proteins | <i>C3, C4a, C4b, C8a, C1qa, C1qb, C1qc, C1ra, C1rb, C1ri, C1rl, C1s1, C1s2, Cd55, C3ar1, C5ar1, C5ar2, Cr2, Fpr1, Clu, Trem2, Cmk1r1, Itgb2, Serping1, Masp1</i>                                                                                                                                                                                                                                                                                                                                                                                                                                                                                                                                                                                                                                                                                                                                                                                                                                                                                                                                                                                                                                                                                                                                                                                                                                                                                                                                                                                                                                                                                                                                                                                 |
| Prostaglandin signaling                                 | <i>Ptgir, Ptgs2, Ptges, Ptgs2os, Ptgfrn, Ptger3, Ptger4, Ptgdr2</i>                                                                                                                                                                                                                                                                                                                                                                                                                                                                                                                                                                                                                                                                                                                                                                                                                                                                                                                                                                                                                                                                                                                                                                                                                                                                                                                                                                                                                                                                                                                                                                                                                                                                              |
| Class I MHC                                             | <i>H2-K1, H2-K2, Ly96, Psmb7, Psmb8, Psmb9, Tap1, Tap2, Tapbp, Cd14, Ctss, H2-Q1, H2-Q2, H2-Q3, H2-Q4, H2-Q5, H2-Q6, H2-Q7, H2-Q10, H2-M2, H2-Aa, H2-Ab1, H2-BI, H2-DMa, H2-DMb1, H2-Ea, H2-Eb1, H2-M2, H2-M3, H2-M5, H2-T3, H2-T22</i>                                                                                                                                                                                                                                                                                                                                                                                                                                                                                                                                                                                                                                                                                                                                                                                                                                                                                                                                                                                                                                                                                                                                                                                                                                                                                                                                                                                                                                                                                                          |
| Class II MHC                                            | <i>H2-Aa, H2-Ab1, H2-Ea, H2-Eb1, H2-Eb2, H2-DMa, H2-DMb1, H2-DMb2, H2-Ob, Cd4, Cd74, Cd86, Ctss, Ctsc, Trem2, Mrc1, Tyrobp</i>                                                                                                                                                                                                                                                                                                                                                                                                                                                                                                                                                                                                                                                                                                                                                                                                                                                                                                                                                                                                                                                                                                                                                                                                                                                                                                                                                                                                                                                                                                                                                                                                                   |
| B cell receptor signaling                               | <i>Cd200R1, Blk, Nfkb1, Btk, Nfkbia, Cd22, Cd38, Cd79a, Cd79b, Cmtm3, Blnk, Pik3cd, Lpxn, Prkcb, Ptpn22, Stap1, Ptpn6, Ptpcr, Bank1, Sh2b2, Rftn1, Plcl2, Syk, Nfam1, Nckap1l, Cd300a, Gcsam, Lat2, Itk, Klhl6, Lck, Lyn, Iftm1, Psmb8, Psmb9</i>                                                                                                                                                                                                                                                                                                                                                                                                                                                                                                                                                                                                                                                                                                                                                                                                                                                                                                                                                                                                                                                                                                                                                                                                                                                                                                                                                                                                                                                                                                |
| Lymphocyte activation                                   | <i>Glyrp2, Adam8, Eomes, Ccr2, Adora2a, Mfng, Slamf6, Zc3h12d, Aif1, Mmp14, Prex1, Aire, Btla, Fas, Cd200r1, Msn, Rhoh, Socs1, Slamf7, Myb, Tnfsf14, Axl, Tnfsf14, Bcl3, Ccdc88b, Il18r1, Bid, Cd84, Cxcr5, Bst1, Cd7, Btk, Scart1, Nkg7, Skap2, Nlrc3, Casp8, Sh2d2a, Tlr9, Runx1, Runx2, Runx3, Ccnd3, Cd2, Cd3d, Cd3e, Cd3g, Cd247, Cd4, Cd5, Cd6, Cd8a, Cd8b, Tigit, Cd22, Cd28, Cd86, Tnfsf8, Cd37, Cd38, Cd40, Cd40lg, Cd44, Cd47, Cd48, Cd70, Cd74, Cd79a, Cd79b, Pax5, Cfr, Blnk, Cd83, Ticam2, Icos, Sash3, Pik3cd, Pik3cg, Ccr6, Ccr7, Ncr1, Apbb1ip, Il27ra, Themis2, Adgrg3, Tbx21, Pou2af1, Pou2f2, Cr2, Rsad2, Csf1r, Rorc, Prf1, Il21r, Prkcb, Pkn1, Cxadr, Ripor2, Tox, Psen2, Ptpn22, Sirpa, Jam1, Tespa1, Lax1, Clec4e, Ptpn6, Ptpcr, Clnk, Bank1, Il23r, Rac2, Dock2, Tnfaip8l2, Dtx1, Parp3, Relb, Tspan32, Arpc1b, Elf4, Cmtm7, Trem12, Tcigr1, Ikzf1, F2f11, Fcer1g, Sla2, Ccl5, Gpnmb, Ccl20, Fgr, Foxj1, Flt3, Flt3lg, Zc3h12a, Ikzf3, Themis, Batf, Dock10, St3gal1, Slamf1, Il23a, Tbl3, Klrk1, Slc11a1, Lat, Clec4d, Tnfsf13b, Card11, Fut7, Cd276, Ildr2, Spi1, Cd244, Spib, Spn, Lrrc32, Sit1, Stat3, Stat4, Stat5A, Nod2, Plcl2, Syk, Tacr1, Loxl3, Carmil2, Cracr2A, Nfkbid, Nfam1, Tgfb1, Havcr2, Coro1a, Thy1, Crtam, Tnfrsf13b, Hsh2d, Tnfaip3, Tnfrsf1b, Nckap1l, Hhex, H2-DMa, H2-DMb, H2-O, H2-Aa, H2-K, H2-D, H2-Eb2, Patz1, Cd300a, Clec7a, Hlx, Tnfrsf4, Txk, Ttrobp, Vav, Vcam1, Was, Lat2, Icam1, Irf8, Zap70, Ifnar1, Ifnar2, Rasal3, Pik3r6, Il1b, Il2ra, Il2rb, Il2rg, Il4r, Il6st, Il7r, Il9r, Slamf8, Il12b, Il15, Il15ra, Inpp5d, Irf1, Irf7, Itga4, Itgal, Itgax, Itgb2, Itk, Laptm5, Jak2, Jak3, Cyria, Cxcr4, Kit, Lst1, Slamf9, Lag3, Lck, Lcp1, Lgals1, Nlrp3, Lgals9, Lipa, Cd180, Lyn</i> |
| Type I Interferon and<br>related proteins               | <i>Ifi35, Ifi44, Ifit1, Ifit2, Ifit3, Irf1, Irf2, Irf3, Irf4, Irf5, Irf7, Irf8, Irf9, Mx1, Mx2, Oas12, Oas1a, Oas1b, Oas1c, Oas1g, Oas2, Oas3, Psmb8, Psmb9, Stat1, Stat2, Sting1, Adar, Mmp12, Trim65, Samhd1, Isg15, Ikbke, Tbkbp1, Ptpn6, Nlrc5, Sp100, Ifih1, Usp18, Traf3, Rigi, Zbp1, Ifnar1, Ifnar2</i>                                                                                                                                                                                                                                                                                                                                                                                                                                                                                                                                                                                                                                                                                                                                                                                                                                                                                                                                                                                                                                                                                                                                                                                                                                                                                                                                                                                                                                   |
| Type II Interferon and<br>related proteins              | <i>H2-Eb2, Icam1, Stat1, Ifng, Irf1, Socs1, Parp14, Parp9, Nr1h3, Nlrc5, Sp100, Stat1, Nod2, Hck, Rigi, Txk, Ifngr1, Ifngr2, Jak2</i>                                                                                                                                                                                                                                                                                                                                                                                                                                                                                                                                                                                                                                                                                                                                                                                                                                                                                                                                                                                                                                                                                                                                                                                                                                                                                                                                                                                                                                                                                                                                                                                                            |
| TLR and associated<br>factors                           | <i>Ly96, Nod2, S100a8, S100a9, Pik3ap1, Birc2, Armb2, Btk, Tlr9, Cd86, Cd40, Ticam2, Ctss, Tnip3, TnipP1, Tlr1, Tlr2, Tlr3, Tlr4, Tlr5, Tlr6, Tlr7, Tlr8, Tlr9, Tlr11, Tlr12, Tlr13, Tasl, Smpd13b, Chadl, Irak3, Traf3, Cd300a, Scimp, Irf1, Irf7, Unc93b1, Cd180</i>                                                                                                                                                                                                                                                                                                                                                                                                                                                                                                                                                                                                                                                                                                                                                                                                                                                                                                                                                                                                                                                                                                                                                                                                                                                                                                                                                                                                                                                                           |
| Leukotriene receptors and<br>related enzymes            | <i>Alox5ap, Cysltr1, Cysltr2, Alox12, Alox15, Alox5, Pla2g4a, Ggt5</i>                                                                                                                                                                                                                                                                                                                                                                                                                                                                                                                                                                                                                                                                                                                                                                                                                                                                                                                                                                                                                                                                                                                                                                                                                                                                                                                                                                                                                                                                                                                                                                                                                                                                           |

**Table S2. Downregulation of genes encoding lipid metabolism-related enzymes in the meibomian glands of C-IKK $\alpha$  mice.**

| Cholesterol and Cholesterol esters metabolism |                                                         |                 |
|-----------------------------------------------|---------------------------------------------------------|-----------------|
| Gene                                          | Gene name                                               | <i>p-adjust</i> |
| <i>Acat2</i>                                  | Acetyl-Coenzyme A acetyltransferase2                    | 2.66E-35        |
| <i>Dhcr7</i>                                  | 7-Dehydrocholesterol reductase                          | 8.87E-32        |
| <i>Mvd</i>                                    | Mevalonate diphospho decarboxylase                      | 2.92E-32        |
| <i>Acat1</i>                                  | Acetyl-Coenzyme A acetyltransferase1                    | 4.28E-28        |
| <i>Pmvk</i>                                   | Phosphomevalonate kinase                                | 4.56E-26        |
| <i>Hmgcr</i>                                  | 3-Hydroxy-3-methylglutaryl-Coenzyme A reductase         | 2.78E-25        |
| <i>Msmo1</i>                                  | Methylsterol monooxygenase 1                            | 1.04E-25        |
| <i>Hmgcs2</i>                                 | 3-Hydroxy-3-methylglutaryl-Coenzyme A synthase2         | 5.82E-24        |
| <i>Insig1</i>                                 | Insulin induced gene 1                                  | 1.17E-24        |
| <i>Hmgcs1</i>                                 | 3-Hydroxy-3-methylglutaryl-Coenzyme A synthase1         | 1.78E-23        |
| <i>Lss</i>                                    | Lanosterol synthase                                     | 3.68E-21        |
| <i>Soat1</i>                                  | Sterol O-acyltransferase 1                              | 1.89E-21        |
| <i>Sc5d</i>                                   | Sterol-C5-desaturase                                    | 6.49E-17        |
| <i>Sqle</i>                                   | Squalene epoxidase                                      | 3.17E-15        |
| <i>Stard4</i>                                 | StAR-related lipid transfer (START) domain containing 4 | 9.72E-15        |
| <i>Idi1</i>                                   | Isopentenyl-diphosphate delta isomerase                 | 2.79E-15        |
| <i>Mvk</i>                                    | Mevalonate kinase                                       | 2.33E-14        |
| <i>Dhcr24</i>                                 | 24-dehydrocholesterol reductase                         | 2.30E-13        |
| <i>Fdft1</i>                                  | Farnesyl diphosphate farnesyl transferase 1             | 1.65E-11        |
| <i>Vnn1</i>                                   | Vanin 1                                                 | 1.68E-08        |
| <i>Idi2</i>                                   | Isopentenyl-diphosphate delta isomerase 2               | 0.00044         |

  

| Fatty acid biosynthesis and desaturation genes |                                                             |                 |
|------------------------------------------------|-------------------------------------------------------------|-----------------|
| Gene                                           | Gene name                                                   | <i>p-adjust</i> |
| <i>Fads1</i>                                   | Fatty acid desaturase 1                                     | 1.21E-44        |
| <i>Phyh</i>                                    | Phytanoyl-CoA hydroxylase                                   | 1.37E-36        |
| <i>Fasn</i>                                    | Fatty acid synthase                                         | 4.96E-28        |
| <i>Scd2</i>                                    | Stearoyl-Coenzyme A desaturase 2                            | 9.17E-23        |
| <i>Fads6</i>                                   | Fatty acid desaturase 6                                     | 2.19E-19        |
| <i>Scd3</i>                                    | Stearoyl-Coenzyme A desaturase 3                            | 5.08E-17        |
| <i>Scd4</i>                                    | Stearoyl-Coenzyme A desaturase 4                            | 3.41E-17        |
| <i>Fads2</i>                                   | Fatty acid desaturase 2                                     | 3.03E-12        |
| <i>Scd1</i>                                    | Stearoyl-Coenzyme A desaturase 1                            | 1.15E-12        |
| <i>Fads3</i>                                   | Fatty acid desaturase 1                                     | 0.00083         |
| Fatty acid elongation-related genes            |                                                             |                 |
| <i>Acsbg1</i>                                  | Acyl-CoA synthetase bubblegum family member 1               | 1.56E-42        |
| <i>Elovl7</i>                                  | ELOVL Fatty Acid Elongase 7                                 | 5.40E-36        |
| <i>Hacd2</i>                                   | 3-hydroxyacyl-CoA dehydratase 2                             | 4.90E-33        |
| <i>Elovl4</i>                                  | ELOVL Fatty Acid Elongase 4                                 | 4.51E-33        |
| <i>Hsd17b12</i>                                | Hydroxysteroid (17-beta) dehydrogenase12                    | 8.45E-25        |
| <i>Elovl3</i>                                  | ELOVL Fatty Acid Elongase 3                                 | 9.35E-20        |
| <i>Hacd3</i>                                   | 3-hydroxyacyl-CoA dehydratase 3                             | 5.49E-19        |
| <i>Elovl6</i>                                  | ELOVL Fatty Acid Elongase 6                                 | 9.59E-18        |
| <i>Elovl1</i>                                  | ELOVL family member 1, elongation of long chain fatty acids | 2.65E-18        |
| <i>Hacd4</i>                                   | 3-Hydroxyacyl-CoA dehydratase 4                             | 2.65E-18        |
| <i>Hsd17b10</i>                                | Hydroxysteroid (17-beta) dehydrogenase10                    | 2.27E-10        |
| <i>Hacl1</i>                                   | 2-hydroxyacyl-CoA lyase 1                                   | 0.0001          |

  

| Metabolism of odd-chain and branched fatty acids                        |                                                                             |                 |
|-------------------------------------------------------------------------|-----------------------------------------------------------------------------|-----------------|
| Gene                                                                    | Gene name                                                                   | <i>p-adjust</i> |
| <i>Acox2</i>                                                            | Acyl-Coenzyme A oxidase 2, branched chain                                   | 8.08E-34        |
| <i>Dbt</i>                                                              | Dihydroipoamide branched chain transacylase E2                              | 1.69E-24        |
| <i>Echdc1</i>                                                           | Enoyl Coenzyme A hydratase domain containing 1                              | 1.13E-17        |
| <i>Bckdhb</i>                                                           | Branched chain ketoacid dehydrogenase E1, beta polypeptide                  | 2.38E-15        |
| <i>Pcca</i>                                                             | Propionyl-Coenzyme A carboxylase, alpha polypeptide                         | 8.12E-06        |
| <i>Bckdk</i>                                                            | Branched chain ketoacid dehydrogenase kinase                                | 0.00356         |
| <i>Bcat2</i>                                                            | Branched chain aminotransferase 2, mitochondrial                            | 0.00246         |
| Metabolism of WEs and O-acylated $\omega$ -hydroxy fatty acids (OAHFAs) |                                                                             |                 |
| Gene                                                                    | Gene name                                                                   | <i>p-adjust</i> |
| <i>Awat1</i>                                                            | Acyl-CoA wax alcohol acyltransferase 1                                      | 2.61E-37        |
| <i>Cyp4f39</i>                                                          | Cytochrome P450, family 4, subfamily f, polypeptide 39                      | 3.80E-31        |
| <i>Far2</i>                                                             | Fatty acyl CoA reductase 2                                                  | 4.43E-19        |
| <i>Awat2</i>                                                            | Acyl-CoA wax alcohol acyltransferase 1                                      | 1.24E-17        |
| <i>Far1</i>                                                             | Fatty acyl CoA reductase 2                                                  | 3.66E-10        |
| Regulation of energy balance, lipid storage and mobilization            |                                                                             |                 |
| <i>Plin4</i>                                                            | Perilipin 4                                                                 | 6.81E-45        |
| <i>Plin5</i>                                                            | Perilipin 5                                                                 | 1.81E-44        |
| <i>Ces1d</i>                                                            | Carboxylesterase 1D                                                         | 8.66E-38        |
| <i>Plin2</i>                                                            | Perilipin 2                                                                 | 8.25E-34        |
| <i>Mgl1</i>                                                             | Monoglyceride lipase                                                        | 1.35E-29        |
| <i>Gpat4</i>                                                            | Glycerol-3-phosphate acyltransferase 4                                      | 5.43E-26        |
| <i>Cidea</i>                                                            | Cell death-inducing DNA fragmentation factor, alpha subunit-like effector A | 2.66E-23        |
| <i>Gpam</i>                                                             | Glycerol-3-phosphate acyltransferase mitochondrial                          | 7.15E-22        |
| <i>Plin1</i>                                                            | Perilipin 1                                                                 | 6.85E-14        |
| <i>Dgat2</i>                                                            | Diacylglycerol O-acyltransferase 2                                          | 1.87E-14        |
