# Supplementary material
Source: Research Square preprint supplement (doi:10.21203/rs.3.rs-9300712/v1)

Figure 2C, top

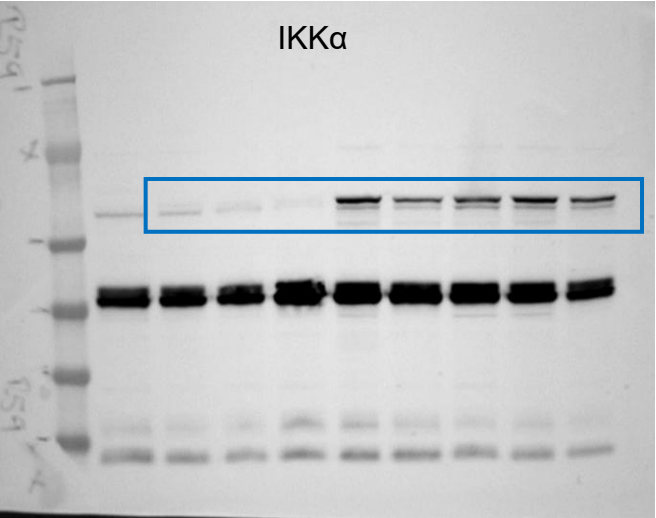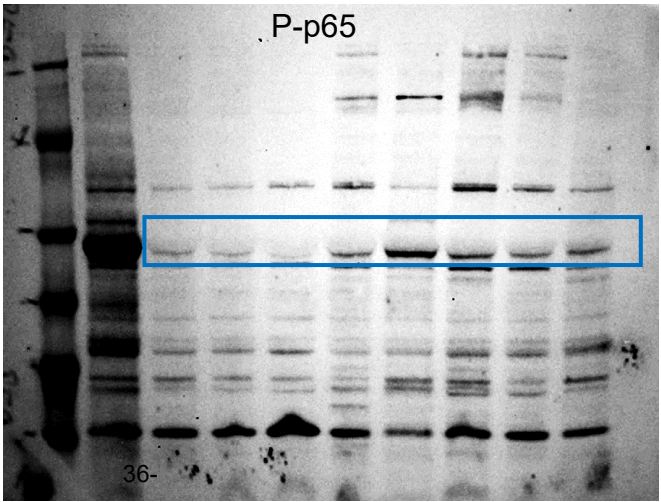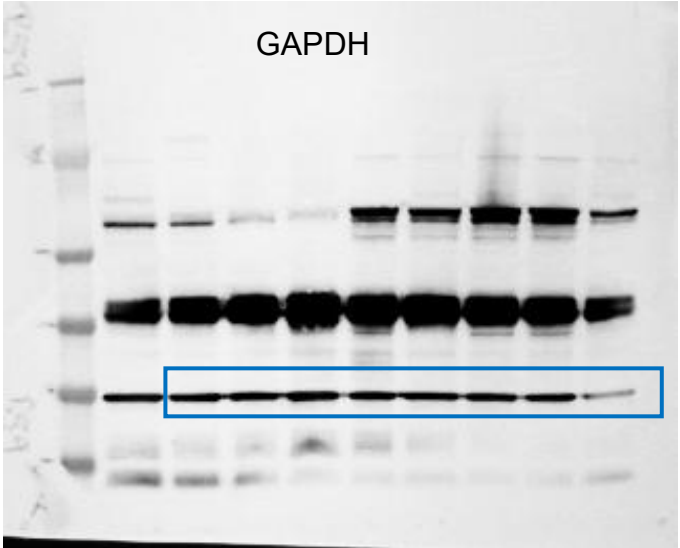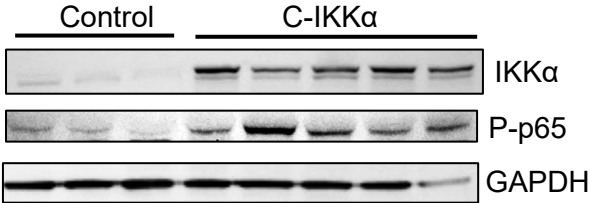

Figure 2C, middle

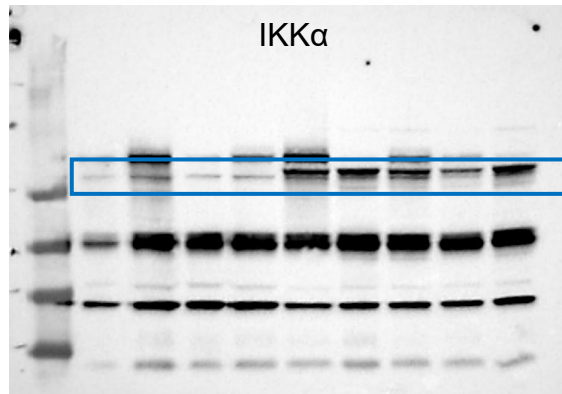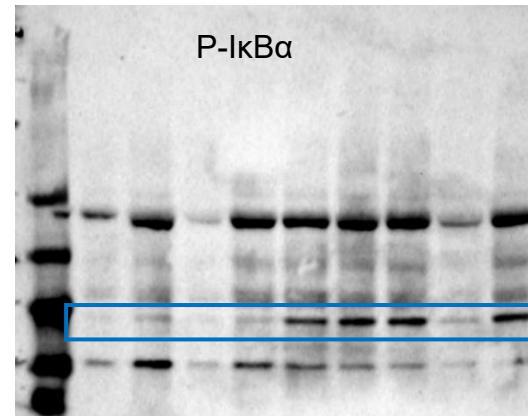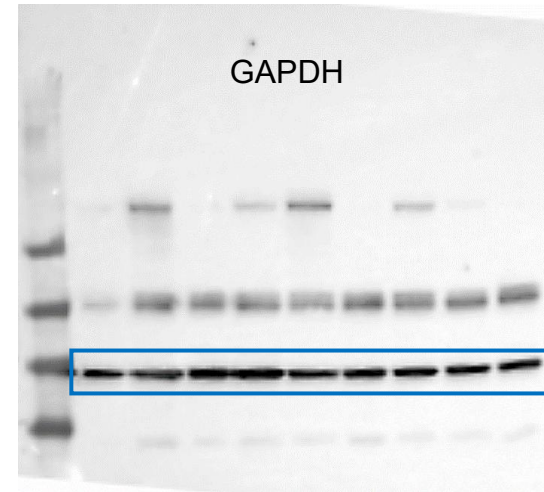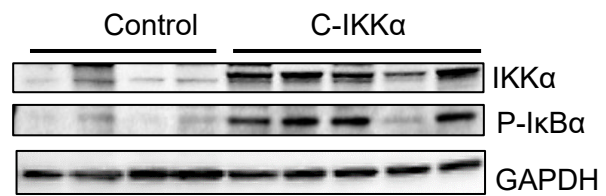

Figure 2C, bottom

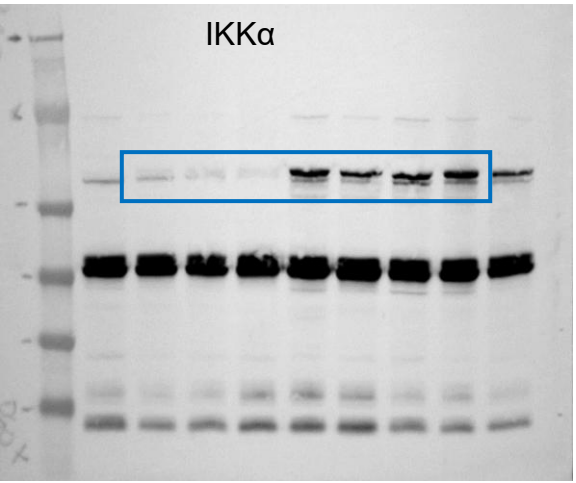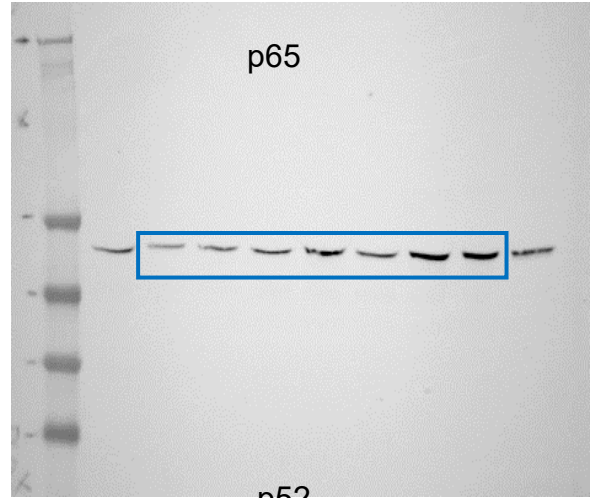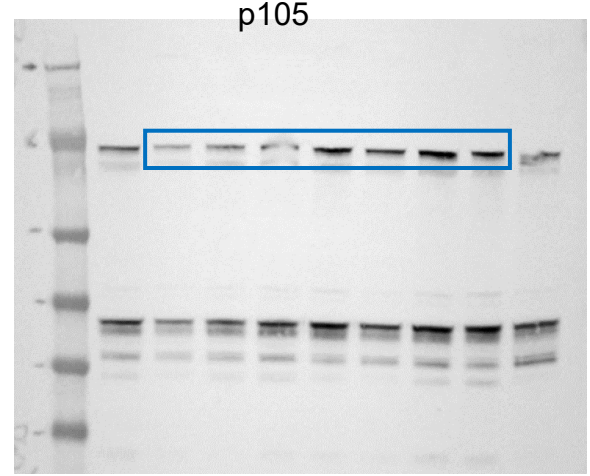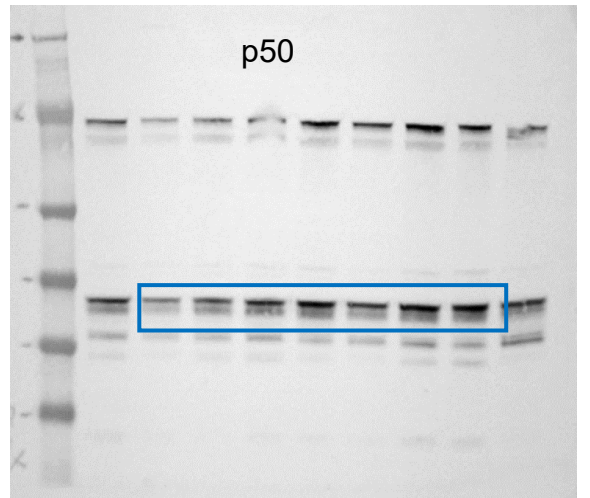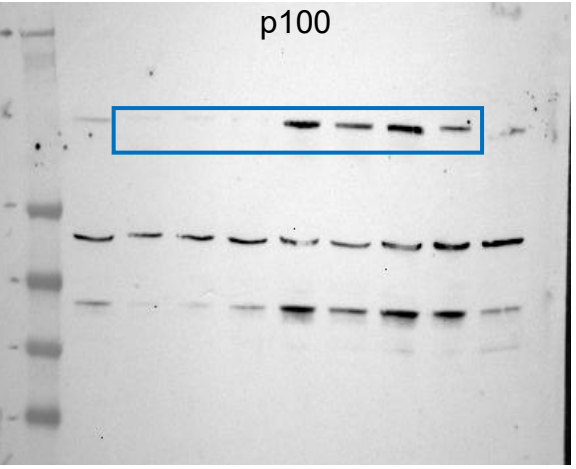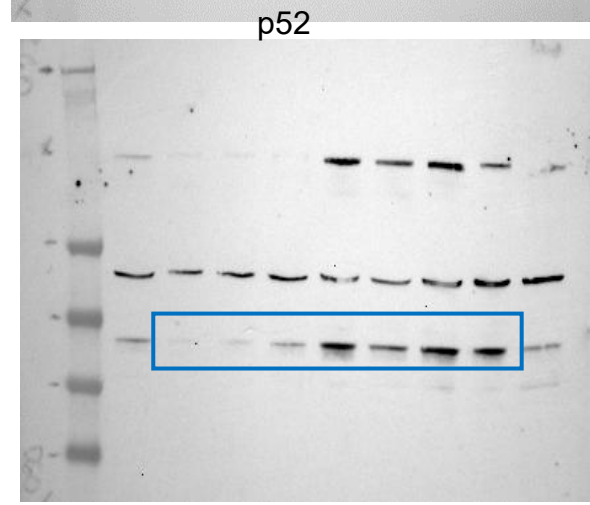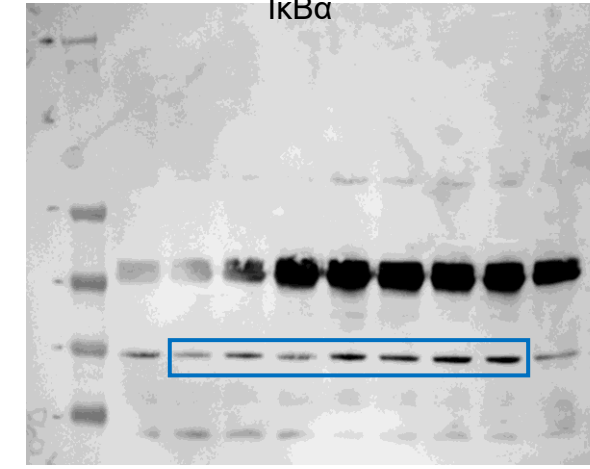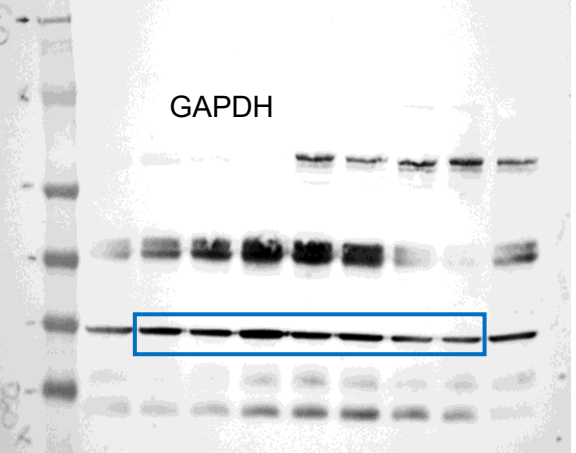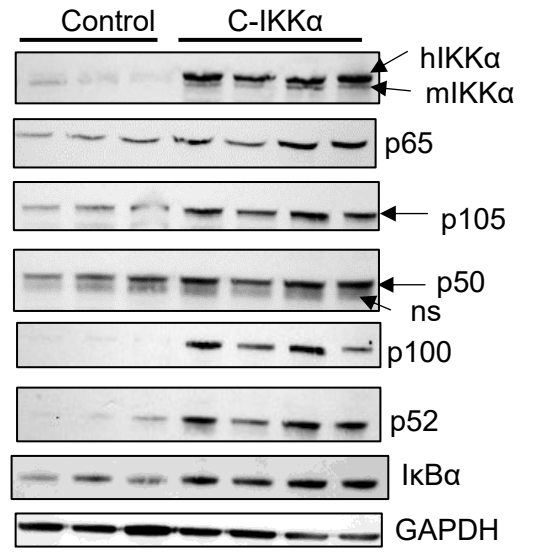

Supplement: Supplementary file 1 [file 2c43f94cc607a484f2ea2c84.pdf]
